# Supplementary material
Source: PubMed Central journal article supplement (PMC1613193)
Supplement: amjpathol_167_6_1561__1.pdf [file amjpathol_167_6_1561__1.pdf]

Supplementary Table 1 – Primers used for qReal-time PCR.

| <b>Gene</b>    | <b>Left Primer sequence (5'-3')</b> | <b>Right Primer sequence (5'-3')</b> |
|----------------|-------------------------------------|--------------------------------------|
| <i>Col1a1</i>  | GAGCGGAGAGTACTGGATCG                | GTCGGGCTGATGTACCAGT                  |
| <i>Thbs</i>    | GTCTCCATGGTCGTCTGT                  | TTCTTGCCAGGCTTTGGTCT                 |
| <i>Cd163</i>   | CTTGTACCCACAGCAGGGAT                | AGCTCCACTCTTCCCTCACA                 |
| <i>Ptprf</i>   | ACCCGATGGCTGAGTACAAC                | GCCTTCACCTGTTTTGGGTA                 |
| <i>Galnt2</i>  | CTGGACACCTTGGGACACTT                | TGCTTCACCGACTTCTCCTT                 |
| <i>Cyp2g1</i>  | TGTCACACGGGACACTCATT                | TGGGTAGCGGAAGTATTTGG                 |
| <i>Jag1</i>    | GAGGTACCTGCGTGGTCAAT                | CCGATACCAGTTGTCTCCGT                 |
| <i>Cald1</i>   | GCCTCAGGAACACCCAATAA                | CCTCAAGTCAGAAGGCTTGG                 |
| <i>Cyp17a1</i> | TGGTCATATGCATGCCAACT                | CCCTTCTTCACGAGCACTTC                 |
| <i>18S</i>     | AGTCCCTACCCTTTGTACACA               | GATCCAAGGGCCTCACTAAAC                |
| <i>Gapdh</i>   | CCCACTAACATCAAATGGGG                | TCTCCATGGTGGTGAAGACA                 |
| <i>Ywhaz</i>   | TTCTTGATCCCCAATGCTTC                | TTCTTGTCATCACCAGCAGC                 |
| <i>Hprt</i>    | TGCTCGAGATGTCATGAAGG                | AATCCAGCAGGTCAGCAAAG                 |
