# Supplementary material
Source: PubMed Central journal article supplement (PMC1613193)
Supplement: amjpathol_167_6_1561__2.pdf [file amjpathol_167_6_1561__2.pdf]

| Cluster A     |                                                              | ANOVA p value |              |          |         |        |
|---------------|--------------------------------------------------------------|---------------|--------------|----------|---------|--------|
| Name          | Description                                                  | NCBI          | Affy Probe   | MIF      | OVX     | Inter  |
| Fkbp10        | FK506_binding_protein_10                                     | NM_010221     | 1415951_at   | 0.0108   | 0.544   | 0.123  |
| Hif1a         | hypoxia_inducible_factor_1_alpha_subunit                     | BB269715      | 1416035_at   | 0.0245   | 0.147   | 0.179  |
| Adam9         | a_disintegrin_and_metalloproteinase_domain_9_(meltrin_gamma) | NM_007404     | 1416094_at   | 0.0279   | 0.2     | 0.317  |
| Fbln5         | fibulin_5                                                    | NM_011812     | 1416164_at   | 0.00589  | 0.656   | 0.0499 |
| Ebf1          | early_B-cell_factor_1                                        | BB125261      | 1416301_a_at | 0.00417  | 0.085   | 0.379  |
| Ugdh          | UDP-glucose_dehydrogenase                                    | NM_009466     | 1416308_at   | 0.0358   | 0.0211  | 0.354  |
| Prelp         | proline_arginine-rich_end_leucine-rich_repeat                | NM_054077     | 1416321_s_at | 0.00828  | 0.285   | 0.247  |
| Atp2a2        | ATPase_Ca++_transporting_cardiac_muscle_slow_twitch_2        | NM_009722     | 1416551_at   | 0.0342   | 0.26    | 0.171  |
| Plod2         | procollagen_lysine_2-oxoglutarate_5-dioxygenase_2            | BC021352      | 1416687_at   | 0.031    | 0.419   | 0.166  |
| Uap1          | UDP-N-acetylglucosamine_pyrophosphorylase_1                  | NM_133806     | 1416743_at   | 0.0318   | 0.187   | 0.172  |
| Sdpr          | serum_deprivation_response                                   | BE197945      | 1416779_at   | 0.0181   | 0.0769  | 0.153  |
| Fkbp7         | FK506_binding_protein_7                                      | NM_010222     | 1416803_at   | 8.08E-05 | 0.0798  | 0.0333 |
| C1qb          | complement_component_1_q_subcomponent_beta_polypeptide       | NM_009777     | 1417063_at   | 0.0292   | 0.39    | 0.306  |
| Cmkor1        | chemokine_orphan_receptor_1                                  | BC015254      | 1417625_s_at | 0.00394  | 0.086   | 0.321  |
| Car4          | carbonic_anhydrase_4                                         | NM_007607     | 1418094_s_at | 0.000428 | 0.0782  | 0.0138 |
| Tncc          | troponin_C_cardiac/slow_skeletal                             | NM_009393     | 1418370_at   | 0.00351  | 0.757   | 0.0572 |
| Ptx3          | pentaxin_related_gene                                        | NM_008987     | 1418666_at   | 0.00454  | 0.0486  | 0.0386 |
| Cd163         | CD163_antigen                                                | NM_053094     | 1419144_at   | 0.000032 | 0.0325  | 0.028  |
| Serpine1      | serine_(or_cysteine)_proteinase_inhibitor_clade_E_member_1   | NM_008871     | 1419149_at   | 0.00759  | 0.59    | 0.0264 |
| Tnnt1         | troponin_T1_skeletal_slow                                    | NM_011618     | 1419606_a_at | 0.0131   | 0.993   | 0.0576 |
| Cxcl5         | chemokine_(C-X-C_motif)_ligand_5                             | NM_009141     | 1419728_at   | 0.00172  | 0.195   | 0.0369 |
| ---           | ---                                                          | AI323359      | 1419872_at   | 0.000783 | 0.515   | 0.0201 |
| 4930422J18Rik | RIKEN_cDNA_4930422J18_gene                                   | AI596360      | 1420150_at   | 0.0164   | 0.663   | 0.0404 |
| Selp          | selectin_platelet                                            | M72332        | 1420558_at   | 0.0101   | 0.932   | 0.0286 |
| Cyp7b1        | cytochrome_P450_family_7_subfamily_b_polypeptide_1           | NM_007825     | 1421075_s_at | 0.0376   | 0.712   | 0.145  |
| Ccr2          | chemokine_(C-C)_receptor_2                                   | BB148128      | 1421186_at   | 0.00244  | 0.0286  | 0.134  |
| Sh3bgrl       | SH3-binding_domain_glutamic_acid-rich_protein_like           | NM_019989     | 1421871_at   | 0.027    | 0.438   | 0.24   |
| Il1rl1        | interleukin_1_receptor-like_1                                | NM_010743     | 1422317_a_at | 0.017    | 0.31    | 0.0778 |
| Rrad          | Ras-related_associated_with_diabetes                         | NM_019662     | 1422562_at   | 0.00217  | 0.112   | 0.0207 |
| 4930517K11Rik | RIKEN_cDNA_4930517K11_gene                                   | AK005645      | 1423327_at   | 6.84E-05 | 0.00998 | 0.0885 |
| Bicc1         | bicaudal_C_homolog_1_(Drosophila)                            | BM217996      | 1423484_at   | 0.000113 | 0.158   | 0.0212 |
| 1200002N14Rik | RIKEN_cDNA_1200002N14_gene                                   | BC021433      | 1424524_at   | 0.00454  | 0.399   | 0.0717 |
| Fbn1          | fibrillin_1                                                  | AF007248      | 1425896_a_at | 0.00171  | 0.314   | 0.0236 |
| Pros1         | protein_S_(alpha)                                            | Z25469        | 1426246_at   | 0.00582  | 0.346   | 0.0868 |
| Tgfbr2        | transforming_growth_factor_beta_receptor_II                  | BG793483      | 1426397_at   | 0.00115  | 0.252   | 0.0586 |
| Ets1          | E26_avian_leukemia_oncogene_1_5'_domain                      | BB151715      | 1426725_s_at | 0.00109  | 0.0408  | 0.0753 |
| 2310020L09Rik | RIKEN_cDNA_2310020L09_gene                                   | AK009425      | 1426972_at   | 0.00223  | 0.413   | 0.023  |
| Slc39a14      | solute_carrier_family_39_(zinc_transporter)_member_14        | BB399837      | 1427035_at   | 0.0232   | 0.314   | 0.21   |
| D930038M13Rik | RIKEN_cDNA_D930038M13_gene                                   | BC026627      | 1427054_s_at | 0.0239   | 0.113   | 0.574  |

|               |                                                                                           |           |              |          |        |         |
|---------------|-------------------------------------------------------------------------------------------|-----------|--------------|----------|--------|---------|
| Col14a1       | procollagen_type_XIV_alpha_1                                                              | AJ131395  | 1427168_a_at | 0.0036   | 0.271  | 0.0569  |
| Myl3          | myosin_light_polypeptide_3_alkali_ventricular_skeletal_slow                               | X67685    | 1427768_s_at | 0.0407   | 0.42   | 0.209   |
| Hoxd8         | homeo_box_D8                                                                              | AA265122  | 1431099_at   | 0.0101   | 0.908  | 0.0227  |
| Plekhc1       | pleckstrin_homology_domain_containing_family_C_(with_FERM_domain)_member_1                | BG070082  | 1434181_at   | 0.0308   | 0.905  | 0.0665  |
| BC003494      | cDNA_sequence_BC003494                                                                    | BB699319  | 1435056_x_at | 0.00728  | 0.0474 | 0.304   |
| ---           | Mus_musculus_adult_female_vagina_cDNA_RIKEN_full-length_enriched_library_clone:9930106P14 | BG071867  | 1435327_at   | 0.0496   | 0.188  | 0.26    |
| Ndn           | necdin                                                                                    | AW743020  | 1435383_x_at | 0.00328  | 0.162  | 0.0817  |
| Arhc          | ras_homolog_gene_family_member_C                                                          | AI503490  | 1435394_s_at | 0.00905  | 0.231  | 0.128   |
| Fcgr2b        | Fc_receptor_IgG_low_affinity_IIb                                                          | BM224327  | 1435477_s_at | 0.0247   | 0.23   | 0.249   |
| C1qb          | complement_component_1_q_subcomponent_beta_polypeptide                                    | BB111335  | 1437726_x_at | 2.06E-05 | 0.0173 | 0.00428 |
| Myadm         | myeloid-associated_differentiation_marker                                                 | BB500055  | 1439389_s_at | 0.00474  | 0.146  | 0.0781  |
| Gus           | beta-glucuronidase                                                                        | NM_010368 | 1448124_at   | 0.0199   | 0.574  | 0.166   |
| Lox           | lysyl_oxidase                                                                             | M65143    | 1448228_at   | 0.00067  | 0.128  | 0.0539  |
| Cklfsf3       | chemokine-like_factor_super_family_3                                                      | NM_024217 | 1448316_at   | 0.002    | 0.541  | 0.0517  |
| Myl2          | myosin_light_polypeptide_2_regulatory_cardiac_slow                                        | NM_010861 | 1448394_at   | 0.0202   | 0.25   | 0.109   |
| 2810002E22Rik | RIKEN_cDNA_2810002E22_gene                                                                | NM_133859 | 1448475_at   | 0.000839 | 0.208  | 0.0044  |
| Lbp           | lipopolysaccharide_binding_protein                                                        | NM_008489 | 1448550_at   | 0.0149   | 0.186  | 0.0544  |
| Myh6          | myosin_heavy_polypeptide_6_cardiac_muscle_alpha                                           | NM_080728 | 1448553_at   | 0.0377   | 0.428  | 0.187   |
| Ctss          | cathepsin_S                                                                               | NM_021281 | 1448591_at   | 0.0446   | 0.936  | 0.113   |
| Elk3          | ELK3_member_of_ETS_oncogene_family                                                        | BC005686  | 1448797_at   | 0.0026   | 0.143  | 0.0633  |
| Ptgis         | prostaglandin_I2_(prostacyclin)_synthase                                                  | NM_008968 | 1448816_at   | 0.00806  | 0.387  | 0.149   |
| 1110055L24Rik | RIKEN_cDNA_1110055L24_gene                                                                | NM_025422 | 1448919_at   | 0.00376  | 0.0378 | 0.0551  |
| F13a          | coagulation_factor_XIII_alpha_subunit                                                     | NM_028784 | 1448929_at   | 0.0116   | 0.655  | 0.0378  |
| Car4          | carbonic_anhydrase_4                                                                      | NM_007607 | 1448949_at   | 0.00119  | 0.0516 | 0.0245  |
| Socs2         | suppressor_of_cytokine_signaling_2                                                        | NM_007706 | 1449109_at   | 0.0406   | 0.873  | 0.0545  |
| Prg4          | proteoglycan_4_(megakaryocyte_stimulating_factor_articular_superficial_zone_protein)      | NM_021400 | 1449824_at   | 0.000436 | 0.624  | 0.0131  |
| Prkg1         | protein_kinase_cGMP-dependent_type_I                                                      | NM_011160 | 1449876_at   | 0.0366   | 0.0533 | 0.0589  |
| Tpm3          | tropomyosin_3_gamma                                                                       | NM_022314 | 1449996_a_at | 0.0204   | 0.435  | 0.191   |
| Tpm3          | tropomyosin_3_gamma                                                                       | NM_022314 | 1449997_at   | 0.0163   | 0.393  | 0.0492  |
| Mrc1          | mannose_receptor_C_type_1                                                                 | NM_008625 | 1450430_at   | 0.00152  | 0.0754 | 0.186   |
| Bcat1         | branched_chain_aminotransferase_1_cytosolic                                               | X17502    | 1450871_a_at | 0.00311  | 0.606  | 0.013   |
| Cugbp2        | CUG_triplet_repeat_RNA_binding_protein_2                                                  | BB644164  | 1451154_a_at | 0.0343   | 0.381  | 0.27    |
| Ets1          | E26_avian_leukemia_oncogene_1_5_prime_domain                                              | BB151715  | 1452163_at   | 0.00723  | 0.296  | 0.148   |
| 2310045A20Rik | RIKEN_cDNA_2310045A20_gene                                                                | BC026655  | 1452227_at   | 0.0112   | 0.238  | 0.0141  |
| Ifi205        | interferon_activated_gene_205                                                             | M74124    | 1452231_x_at | 0.0409   | 0.47   | 0.0728  |
| Tpbpb         | trophoblast_specific_protein_beta                                                         | BG064656  | 1452352_at   | 0.000176 | 0.0749 | 0.0214  |
| Atp2a2        | ATPase_Ca++_transporting_cardiac_muscle_slow_twitch_2                                     | AA245637  | 1452363_a_at | 0.0101   | 0.271  | 0.2     |
| Npn1          | neoplastic_progression_1                                                                  | BB542096  | 1452382_at   | 0.00406  | 0.026  | 0.144   |
| ---           | ---                                                                                       | BF719154  | 1452418_at   | 0.0802   | 0.0215 | 0.0479  |
| Ap1s2         | adaptor-related_protein_complex_1_sigma_2_subunit                                         | AK005223  | 1452657_at   | 0.0272   | 0.944  | 0.116   |
| Tgfb1i4       | transforming_growth_factor_beta_1_induced_transcript_4                                    | AU016382  | 1454758_a_at | 0.00178  | 0.495  | 0.0611  |

|               |                                                                             |           |              |          |        |        |
|---------------|-----------------------------------------------------------------------------|-----------|--------------|----------|--------|--------|
| ---           | Mus_musculus_similar_to_glucosamine-6-phosphate_deaminase_(LOC381691),_mRNA | BB777344  | 1455065_x_at | 0.0224   | 0.156  | 0.203  |
| Lgals1        | lectin,_galactose_binding,_soluble_1                                        | AI642438  | 1455439_a_at | 3.24E-06 | 0.065  | 0.0022 |
| Il2rg         | interleukin_2_receptor,_gamma_chain                                         | L20048    | 1416295_a_at | 0.0784   | 0.518  | 0.219  |
| Plod2         | procollagen_lysinase,_2-oxoglutarate_5-dioxygenase_2                        | BC021352  | 1416686_at   | 0.0674   | 0.863  | 0.0324 |
| Qk            | quaking                                                                     | NM_021881 | 1417073_a_at | 0.0671   | 0.363  | 0.309  |
| Mef2a         | myocyte_enhancer_factor_2A                                                  | NM_013597 | 1421252_a_at | 0.252    | 0.0597 | 0.207  |
| Lypla3        | lysophospholipase_3                                                         | BC019373  | 1423704_at   | 0.0959   | 0.448  | 0.0884 |
| Lmcd1         | LIM_and_cysteine-rich_domains_1                                             | BC019124  | 1424596_s_at | 0.0745   | 0.308  | 0.0895 |
| 2700053F16Rik | RIKEN_cDNA_2700053F16_gene                                                  | BC009151  | 1424650_at   | 0.0766   | 0.635  | 0.0851 |
| Tgfb1i4       | transforming_growth_factor_beta_1_induced_transcript_4                      | AF201285  | 1425742_a_at | 0.0776   | 0.863  | 0.186  |
| Ugp2          | UDP-glucose_pyrophosphorylase_2                                             | AI788759  | 1426460_a_at | 0.0503   | 0.814  | 0.0748 |
| 4833417L20Rik | RIKEN_cDNA_4833417L20_gene                                                  | AK017914  | 1427279_at   | 0.0959   | 0.468  | 0.18   |
| Myl3          | myosin,_light_polypeptide_3,_alkali;_ventricular,_skeletal,_slow            | AK002312  | 1428266_at   | 0.0785   | 0.884  | 0.114  |
| Surf4         | surfeit_gene_4                                                              | BB095883  | 1434589_x_at | 0.0907   | 0.933  | 0.191  |
| Chpt1         | choline_phosphotransferase_1                                                | BF180212  | 1435446_a_at | 0.0733   | 0.351  | 0.346  |
| Sycp3         | synaptonemal_complex_protein_3                                              | BM899344  | 1435870_at   | 0.0869   | 0.996  | 0.122  |
| Cd1d1         | CD1d1_antigen                                                               | NM_007639 | 1449130_at   | 0.0581   | 0.984  | 0.145  |
| Il6           | interleukin_6                                                               | NM_031168 | 1450297_at   | 0.0875   | 0.263  | 0.109  |
| Synpo2        | synaptopodin_2                                                              | NM_080451 | 1450828_at   | 0.0858   | 0.834  | 0.0543 |
| Lip1          | lysosomal_acid_lipase_1                                                     | AI596237  | 1450872_s_at | 0.0923   | 0.703  | 0.234  |
| 3300001H21Rik | RIKEN_cDNA_3300001H21_gene                                                  | AV171622  | 1454858_x_at | 0.0702   | 0.364  | 0.355  |

| Cluster B |                                                                  | ANOVA p value |              |        |        |       |
|-----------|------------------------------------------------------------------|---------------|--------------|--------|--------|-------|
| Name      | Description                                                      | NCBI          | Affy Probe   | MIF    | OVX    | Inter |
| Anxa6     | annexin_A6                                                       | NM_013472     | 1415818_at   | 0.0903 | 0.59   | 0.371 |
| Nope      | neighbor_of_Punc_E11                                             | NM_020043     | 1416474_at   | 0.0571 | 0.298  | 0.122 |
| Fhl1      | four_and_a_half_LIM_domains_1                                    | U41739        | 1417872_at   | 0.0807 | 0.38   | 0.215 |
| Col8a1    | procollagen,_type_VIII,_alpha_1                                  | NM_007739     | 1418440_at   | 0.0709 | 0.43   | 0.154 |
| Clu       | clusterin                                                        | NM_013492     | 1418626_a_at | 0.0537 | 0.62   | 0.413 |
| Shank3    | SH3/ankyrin_domain_gene_3                                        | NM_021423     | 1419137_at   | 0.0532 | 0.76   | 0.129 |
| Ms4a11    | membrane-spanning_4-domains,_subfamily_A,_member_11              | NM_026835     | 1419599_s_at | 0.0855 | 0.814  | 0.365 |
| Dab2      | disabled_homolog_2_(Drosophila)                                  | NM_023118     | 1420498_a_at | 0.0638 | 0.866  | 0.361 |
| Glul      | glutamate-ammonia_ligase_(glutamine_synthase)                    | AI391218      | 1426235_a_at | 0.0659 | 0.39   | 0.204 |
| Mpeg1     | macrophage_expressed_gene_1                                      | L20315        | 1427076_at   | 0.0756 | 0.38   | 0.142 |
| Myl3      | myosin,_light_polypeptide_3,_alkali;_ventricular,_skeletal,_slow | X67685        | 1427769_x_at | 0.0608 | 0.596  | 0.275 |
| Bteb1     | basic_transcription_element_binding_protein_1                    | AW488885      | 1428288_at   | 0.143  | 0.0672 | 0.25  |
| Ugp2      | UDP-glucose_pyrophosphorylase_2                                  | AW146314      | 1434486_x_at | 0.0851 | 0.795  | 0.391 |
| Ptp4a2    | protein_tyrosine_phosphatase_4a2                                 | AW495875      | 1435129_at   | 0.0616 | 0.339  | 0.684 |
| Thbd      | thrombomodulin                                                   | NM_009378     | 1448529_at   | 0.0743 | 0.546  | 0.478 |
| Podxl     | podocalyxin-like                                                 | AF290209      | 1448688_at   | 0.0997 | 0.45   | 0.198 |
| Cdo1      | cysteine_dioxygenase_1,_cytosolic                                | NM_033037     | 1448842_at   | 0.058  | 0.887  | 0.286 |

|               |                                                                                             |           |              |          |        |        |
|---------------|---------------------------------------------------------------------------------------------|-----------|--------------|----------|--------|--------|
| Icam2         | intercellular_adhesion_molecule_2                                                           | NM_010494 | 1448862_at   | 0.0988   | 0.825  | 0.261  |
| Hexa          | hexosaminidase_A                                                                            | U07631    | 1449024_a_at | 0.0994   | 0.82   | 0.379  |
| Retn          | resistin                                                                                    | NM_022984 | 1449182_at   | 0.0545   | 0.97   | 0.447  |
| Facl2         | fatty_acid_Coenzyme_A_ligase,_long_chain_2                                                  | BI413218  | 1450643_s_at | 0.0964   | 0.815  | 0.411  |
| Cd36          | CD36_antigen                                                                                | BB534670  | 1450884_at   | 0.091    | 0.392  | 0.577  |
| Mb            | myoglobin                                                                                   | BC025172  | 1451203_at   | 0.0794   | 0.897  | 0.258  |
| 5730439E10Rik | RIKEN_cDNA_5730439E10_gene                                                                  | BQ031255  | 1454647_at   | 0.0909   | 0.455  | 0.501  |
| Clu           | clusterin                                                                                   | BB433678  | 1454849_x_at | 0.063    | 0.609  | 0.433  |
| Lpl           | lipoprotein_lipase                                                                          | BC003305  | 1415904_at   | 0.0297   | 0.676  | 0.28   |
| Sparcl1       | SPARC-like_1_(mast9_hevin)                                                                  | NM_010097 | 1416114_at   | 0.00245  | 0.748  | 0.0551 |
| Lox           | lysyl_oxidase                                                                               | M65143    | 1416121_at   | 0.000665 | 0.392  | 0.0666 |
| Mmp2          | matrix_metalloproteinase_2                                                                  | NM_008610 | 1416136_at   | 0.0124   | 0.474  | 0.352  |
| Col5a1        | procollagen,_type_V,_alpha_1                                                                | AW744319  | 1416741_at   | 0.0131   | 0.982  | 0.209  |
| Hsd3b7        | hydroxy-delta-5-steroid_dehydrogenase,_3_beta-_and_steroid_delta-isomerase_7                | NM_133943 | 1416968_a_at | 0.00909  | 0.603  | 0.246  |
| C1r           | complement_component_1,_r_subcomponent                                                      | NM_023143 | 1417009_at   | 0.0296   | 0.439  | 0.298  |
| Man1a         | mannosidase_1,_alpha                                                                        | BB070019  | 1417110_at   | 0.00159  | 0.285  | 0.162  |
| Man1a         | mannosidase_1,_alpha                                                                        | BB070019  | 1417111_at   | 0.0167   | 0.61   | 0.255  |
| Fmo1          | flavin_containing_monooxygenase_1                                                           | BC011229  | 1417429_at   | 0.0278   | 0.676  | 0.266  |
| Rgs5          | regulator_of_G-protein_signaling_5                                                          | NM_133736 | 1417466_at   | 0.009    | 0.259  | 0.461  |
| Sod3          | superoxide_dismutase_3,_extracellular                                                       | NM_011435 | 1417633_at   | 0.0301   | 0.585  | 0.234  |
| Ccl9          | chemokine_(C-C_motif)_ligand_9                                                              | AF128196  | 1417936_at   | 0.0182   | 0.69   | 0.147  |
| Eltf1         | EGF,_latrophilin_seven_transmembrane_domain_containing_1                                    | BC017134  | 1418059_at   | 0.0185   | 0.615  | 0.24   |
| Gpr124        | G_protein-coupled_receptor_124                                                              | NM_054044 | 1418379_s_at | 0.00441  | 0.148  | 0.47   |
| Mfap5         | microfibrillar_associated_protein_5                                                         | NM_015776 | 1418454_at   | 0.00002  | 0.0433 | 0.0853 |
| Osmr          | oncostatin_M_receptor                                                                       | AB015978  | 1418674_at   | 0.0481   | 0.233  | 0.586  |
| Myoz2         | myozenin_2                                                                                  | NM_021503 | 1418769_at   | 0.0351   | 0.83   | 0.262  |
| Serpina3n     | serine_(or_cysteine)_proteinase_inhibitor,_clade_A,_member_3N                               | NM_009252 | 1419100_at   | 0.0218   | 0.946  | 0.205  |
| C3ar1         | complement_component_3a_receptor_1                                                          | NM_009779 | 1419483_at   | 0.0422   | 0.984  | 0.265  |
| Ankrd2        | ankyrin_repeat_domain_2_(stretch_responsive_muscle)                                         | NM_020033 | 1419621_at   | 0.00272  | 0.288  | 0.0499 |
| Ogn           | osteoglycin                                                                                 | BB542051  | 1419663_at   | 0.00578  | 0.205  | 0.299  |
| Mup1          | major_urinary_protein_1                                                                     | NM_031188 | 1420465_s_at | 0.0838   | 0.0302 | 0.0396 |
| Hspb7         | heat_shock_protein_family,_member_7_(cardiovascular)                                        | BG968304  | 1421290_at   | 0.00587  | 0.45   | 0.0413 |
| Pdgfra        | platelet_derived_growth_factor_receptor,_alpha_polypeptide                                  | AW537708  | 1421917_at   | 0.000383 | 0.298  | 0.0595 |
| Thbs2         | thrombospondin_2                                                                            | NM_011581 | 1422571_at   | 0.00759  | 0.733  | 0.153  |
| ---           | Mus_musculus_transcribed_sequence_with_moderate_similarity_to_protein_sp:Q9UBF2_(H.sapiens) | AW555393  | 1423294_at   | 0.00372  | 0.946  | 0.167  |
| Fbln2         | fibulin_2                                                                                   | BF228318  | 1423407_a_at | 0.0096   | 0.786  | 0.278  |
| Lyzs          | lysozyme                                                                                    | AW208566  | 1423547_at   | 0.0279   | 0.427  | 0.124  |
| Dab2          | disabled_homolog_2_(Drosophila)                                                             | BC006588  | 1423805_at   | 0.00419  | 0.861  | 0.0458 |
| A430103C15Rik | RIKEN_cDNA_A430103C15_gene                                                                  | BC024402  | 1424754_at   | 0.00806  | 0.684  | 0.181  |
| Myh2          | myosin,_heavy_polypeptide_2,_skeletal_muscle,_adult                                         | BC008538  | 1425153_at   | 0.0222   | 0.927  | 0.288  |
| Gilz          | glucocorticoid-induced_leucine_zipper                                                       | AF201289  | 1425281_a_at | 0.0227   | 0.0219 | 0.0311 |

|               |                                                                                                 |           |              |          |       |        |
|---------------|-------------------------------------------------------------------------------------------------|-----------|--------------|----------|-------|--------|
| Anxa5         | annexin_A5                                                                                      | D63423    | 1425567_a_at | 0.0182   | 0.175 | 0.422  |
| 0610012K22Rik | RIKEN_cDNA_0610012K22_gene                                                                      | AB034693  | 1425582_a_at | 0.00093  | 0.958 | 0.102  |
| Gpm6b         | glycoprotein_m6b                                                                                | AF254879  | 1425942_a_at | 0.0271   | 0.35  | 0.0416 |
| Mup3          | major_urinary_protein_3                                                                         | M27608    | 1426154_s_at | 0.0167   | 0.134 | 0.0359 |
| Nov           | nephroblastoma_overexpressed_gene                                                               | X96585    | 1426851_a_at | 0.0297   | 0.547 | 0.252  |
| Nov           | nephroblastoma_overexpressed_gene                                                               | X96585    | 1426852_x_at | 0.00298  | 0.322 | 0.246  |
| Adamts15      | a_disintegrin-like_and_metalloprotease_(reprolysin_type)_with_thrombospondin_type_1_motif_15    | AV228731  | 1427056_at   | 0.0175   | 0.672 | 0.24   |
| 2310046G15Rik | RIKEN_cDNA_2310046G15_gene                                                                      | AK009847  | 1431057_a_at | 0.0116   | 0.481 | 0.411  |
| C1qb          | complement_component_1,_q_subcomponent,_beta_polypeptide                                        | AW227993  | 1434366_x_at | 0.000147 | 0.787 | 0.0506 |
| ---           | Mus_musculus_11_days_pregnant_adult_female_ovary_and_uterus_cDNA,_RIKEN_full-length_enriched    | AV287497  | 1434472_at   | 0.0242   | 0.55  | 0.085  |
| Col5a1        | procollagen,_type_V,_alpha_1                                                                    | AV246911  | 1434479_at   | 0.00425  | 0.644 | 0.202  |
| Ndn           | necdin                                                                                          | AW743020  | 1435382_at   | 0.0074   | 0.484 | 0.212  |
| Laptm5        | lysosomal-associated_protein_transmembrane_5                                                    | BB218107  | 1436905_x_at | 0.0226   | 0.55  | 0.292  |
| ---           | ---                                                                                             | AV066625  | 1436996_x_at | 0.00822  | 0.655 | 0.153  |
| Vim           | vimentin                                                                                        | AV147875  | 1438118_x_at | 0.00536  | 0.511 | 0.266  |
| ---           | Mus_musculus_transcribed_sequence_with_strong_similarity_to_protein_ref:NP_004521.1_(H.sapiens) | BF147716  | 1439364_a_at | 0.00463  | 0.218 | 0.24   |
| H19           | H19_fetal_liver_mRNA                                                                            | NM_023123 | 1448194_a_at | 0.0455   | 0.287 | 0.106  |
| Sfrp2         | secreted_frizzled-related_sequence_protein_2                                                    | NM_009144 | 1448201_at   | 0.00116  | 0.269 | 0.195  |
| 9030425E11Rik | RIKEN_cDNA_9030425E11_gene                                                                      | BG072972  | 1448250_at   | 0.00232  | 0.221 | 0.044  |
| Tm4sf7        | transmembrane_4_superfamily_member_7                                                            | NM_053082 | 1448276_at   | 0.00708  | 0.779 | 0.116  |
| Tpbpb         | trophoblast_specific_protein_beta                                                               | NM_007796 | 1448471_a_at | 6.55E-05 | 0.058 | 0.135  |
| Myh6          | myosin,_heavy_polypeptide_6,_cardiac_muscle,_alpha                                              | NM_080728 | 1448554_s_at | 0.0427   | 0.724 | 0.277  |
| Ccl9          | chemokine_(C-C_motif)_ligand_9                                                                  | AF128196  | 1448898_at   | 0.0429   | 0.831 | 0.35   |
| Cpxm1         | carboxypeptidase_X_1_(M14_family)                                                               | NM_019696 | 1448901_at   | 0.0184   | 0.66  | 0.282  |
| Gng11         | guanine_nucleotide_binding_protein_(G_protein),_gamma_11                                        | NM_025331 | 1448942_at   | 0.00146  | 0.483 | 0.163  |
| Cxcl4         | chemokine_(C-X-C_motif)_ligand_4                                                                | NM_019932 | 1448995_at   | 0.0366   | 0.764 | 0.343  |
| Aoc3          | amine_oxidase,_copper_containing_3                                                              | NM_009675 | 1449396_at   | 0.0124   | 0.353 | 0.294  |
| C1qg          | complement_component_1,_q_subcomponent,_gamma_polypeptide                                       | NM_007574 | 1449401_at   | 0.0472   | 0.728 | 0.25   |
| Vim           | vimentin                                                                                        | M24849    | 1450641_at   | 0.0179   | 0.885 | 0.251  |
| Tnni1         | troponin_I,_skeletal,_slow_1                                                                    | NM_021467 | 1450813_a_at | 0.00787  | 0.495 | 0.196  |
| Saa3          | serum_amyloid_A_3                                                                               | NM_011315 | 1450826_a_at | 0.000213 | 0.136 | 0.146  |
| Cd36          | CD36_antigen                                                                                    | BB534670  | 1450883_a_at | 0.00758  | 0.625 | 0.163  |
| Fabp4         | fatty_acid_binding_protein_4,_adipocyte                                                         | BC002148  | 1451263_a_at | 0.00249  | 0.143 | 0.395  |
| Ifnar2        | interferon_(alpha_and_beta)_receptor_2                                                          | AF013486  | 1451462_a_at | 0.0151   | 0.71  | 0.198  |
| Ghr           | growth_hormone_receptor                                                                         | BC024375  | 1451501_a_at | 0.0264   | 0.735 | 0.367  |
| Loxl1         | lysyl_oxidase-like_1                                                                            | AF357006  | 1451978_at   | 0.000121 | 0.124 | 0.0705 |
| Col4a1        | procollagen,_type_IV,_alpha_1                                                                   | BF158638  | 1452035_at   | 0.00839  | 0.437 | 0.317  |
| H6pd          | hexose-6-phosphate_dehydrogenase_(glucose_1-dehydrogenase)                                      | BC027358  | 1452145_at   | 0.0367   | 0.894 | 0.225  |
| Ifi205        | interferon_activated_gene_205                                                                   | AI481797  | 1452349_x_at | 0.0462   | 0.926 | 0.246  |
| Itgb1         | integrin_beta_1_(fibronectin_receptor_beta)                                                     | U37029    | 1452545_a_at | 0.0125   | 0.955 | 0.169  |
| Adamts4       | a_disintegrin-like_and_metalloprotease_(reprolysin_type)_with_thrombospondin_type_1_motif_4     | BB443585  | 1452595_at   | 0.000489 | 0.846 | 0.0529 |

|       |                                         |           |            |          |       |       |
|-------|-----------------------------------------|-----------|------------|----------|-------|-------|
| Cp    | ceruloplasmin                           | BB009037  | 1455393_at | 0.0134   | 0.792 | 0.161 |
| Timp1 | tissue_inhibitor_of_metalloproteinase_1 | BC008107  | 1460227_at | 0.000639 | 0.383 | 0.101 |
| Csrp3 | cysteine_and_glycine-rich_protein_3     | NM_013808 | 1460318_at | 0.0365   | 0.654 | 0.232 |

| Cluster C     |                                                                         | ANOVA p value |              |         |        |        |
|---------------|-------------------------------------------------------------------------|---------------|--------------|---------|--------|--------|
| Name          | Description                                                             | NCBI          | Affy Probe   | MIF     | OVX    | Inter  |
| Serpinb7      | serine_(or_cysteine)_proteinase_inhibitor_clade_B_member_7              | NM_027548     | 1449500_at   | 0.0304  | 0.0173 | 0.0319 |
| Cnbp          | cellular_nucleic_acid_binding_protein                                   | NM_013493     | 1416244_a_at | 0.0444  | 0.285  | 0.224  |
| Fscn1         | fascin_homolog_1_actin_bundling_protein_(Strongylocentrotus_purpuratus) | NM_007984     | 1416514_a_at | 0.0403  | 0.411  | 0.83   |
| 2700055K07Rik | RIKEN_cDNA_2700055K07_gene                                              | NM_026481     | 1416713_at   | 0.0196  | 0.322  | 0.204  |
| Tuba1         | tubulin_alpha_1                                                         | NM_011653     | 1418884_x_at | 0.0277  | 0.079  | 0.437  |
| Canx          | calnexin                                                                | BI653492      | 1422845_at   | 0.0364  | 0.199  | 0.675  |
| Vapb          | vesicle-associated_membrane_protein_associated_protein_B_and_C          | BF303544      | 1423152_at   | 0.0397  | 0.58   | 0.703  |
| Lamb1-1       | laminin_B1_subunit_1                                                    | BG970109      | 1424114_s_at | 0.00338 | 0.0193 | 0.313  |
| 1500040L08Rik | RIKEN_cDNA_1500040L08_gene                                              | AY043488      | 1424394_at   | 0.00657 | 0.0874 | 0.332  |
| Itgb1         | integrin_beta_1_(fibronectin_receptor_beta)                             | BM120341      | 1426918_at   | 0.0418  | 0.889  | 0.877  |
| 0610037M15Rik | RIKEN_cDNA_0610037M15_gene                                              | BG916808      | 1431008_at   | 0.0014  | 0.679  | 0.597  |
| Ppib          | peptidylprolyl_isomerase_B                                              | AV051525      | 1437649_x_at | 0.0244  | 0.174  | 0.15   |
| Cav           | caveolin_caveolae_protein                                               | AB029929      | 1449145_a_at | 0.0102  | 0.511  | 0.758  |
| Antxr1        | anthrax_toxin_receptor_1                                                | AF378762      | 1451446_at   | 0.0287  | 0.962  | 0.879  |
| Tde1          | tumor_differentially_expressed_1                                        | BE691746      | 1455550_x_at | 0.00113 | 0.504  | 0.311  |
| Itn1          | integral_membrane_protein_1                                             | BB724781      | 1455824_x_at | 0.0299  | 0.292  | 0.425  |
| Tm9sf2        | transmembrane_9_superfamily_member_2                                    | BB131843      | 1455875_x_at | 0.0246  | 0.196  | 0.406  |
| Serpinb1a     | serine_(or_cysteine)_proteinase_inhibitor_clade_B_member_1a             | AF426024      | 1416318_at   | 0.0873  | 0.685  | 0.61   |
| Plvap         | plasmalemma_vesicle_associated_protein                                  | NM_032398     | 1418090_at   | 0.0633  | 0.539  | 0.715  |
| C730049F20Rik | RIKEN_cDNA_C730049F20_gene                                              | BC005569      | 1422603_at   | 0.07    | 0.326  | 0.735  |
| Grp58         | glucose_regulated_protein                                               | BF319868      | 1423423_at   | 0.0547  | 0.147  | 0.404  |
| Mmd           | monocyte_to_macrophage_differentiation-associated                       | BC021914      | 1423489_at   | 0.0677  | 0.474  | 0.695  |
| Cald1         | caldesmon_1                                                             | BI248947      | 1424769_s_at | 0.0606  | 0.14   | 0.667  |
| Trabid        | TRAF-binding_protein                                                    | BG072903      | 1434705_at   | 0.136   | 0.0869 | 0.987  |
| Cnn3          | calponin_3_acidic                                                       | AV172168      | 1436759_x_at | 0.0901  | 0.175  | 0.613  |
| Obrgrp        | leptin_receptor_gene-related_protein                                    | AV156961      | 1436900_x_at | 0.0823  | 0.324  | 0.381  |
| 2310046G15Rik | RIKEN_cDNA_2310046G15_gene                                              | BB378796      | 1437671_x_at | 0.0727  | 0.454  | 0.906  |
| BC003494      | cDNA_sequence_BC003494                                                  | BB027731      | 1437845_x_at | 0.0639  | 0.175  | 0.792  |
| Rex3          | reduced_expression_3                                                    | NM_009052     | 1448595_a_at | 0.0933  | 0.781  | 0.674  |
| Itn1          | integral_membrane_protein_1                                             | AA756810      | 1450841_at   | 0.0597  | 0.195  | 0.741  |
| Orm1          | orosomuroid_1                                                           | BE628912      | 1451054_at   | 0.0731  | 0.813  | 0.894  |
| ---           | ---                                                                     | U58494        | 1451626_x_at | 0.0948  | 0.326  | 0.296  |
| Tpt1h         | tRNA_splicing_2'_phosphotransferase_1_homolog_(S_cerevisiae)            | BB113173      | 1456014_s_at | 0.0906  | 0.419  | 0.789  |
| Fkbp1a        | FK506_binding_protein_1a                                                | AV038603      | 1456196_x_at | 0.0728  | 0.247  | 0.879  |
| 3230401N03Rik | RIKEN_cDNA_3230401N03_gene                                              | BB392869      | 1456739_x_at | 0.0612  | 0.411  | 0.96   |

|               |                                                                                |           |              |          |        |       |
|---------------|--------------------------------------------------------------------------------|-----------|--------------|----------|--------|-------|
| Scd2          | stearoyl-Coenzyme_A_desaturase_2                                               | BG060909  | 1415824_at   | 0.00791  | 0.43   | 0.92  |
| Tde2          | tumor_differentially_expressed_2                                               | AK005203  | 1415838_at   | 0.0325   | 0.322  | 0.841 |
| Calu          | calumenin                                                                      | NM_007594 | 1415870_at   | 0.00696  | 0.211  | 0.869 |
| Cd34          | CD34_antigen                                                                   | NM_133654 | 1416072_at   | 0.00383  | 0.317  | 0.937 |
| Serpinf1      | serine_(or_cysteine)_proteinase_inhibitor_clade_F_member_1                     | NM_011340 | 1416168_at   | 0.00499  | 0.29   | 0.92  |
| Crip1         | cysteine-rich_protein_1_(intestinal)                                           | NM_007763 | 1416326_at   | 0.026    | 0.646  | 0.639 |
| Mif           | macrophage_migration_inhibitory_factor                                         | NM_010798 | 1416335_at   | 5.07E-06 | 0.435  | 0.825 |
| Bgn           | biglycan                                                                       | BC019502  | 1416405_at   | 0.0421   | 0.434  | 0.912 |
| Sparc         | secreted_acidic_cysteine_rich_glycoprotein                                     | NM_009242 | 1416589_at   | 0.0018   | 0.665  | 0.923 |
| Serping1      | serine_(or_cysteine)_proteinase_inhibitor_clade_G_member_1                     | NM_009776 | 1416625_at   | 0.024    | 0.388  | 0.78  |
| 5730536A07Rik | RIKEN_cDNA_5730536A07_gene                                                     | NM_026635 | 1416633_a_at | 0.0435   | 0.445  | 0.772 |
| Sdpr          | serum_deprivation_response                                                     | BE197945  | 1416778_at   | 0.0343   | 0.894  | 0.55  |
| Nid1          | nidogen_1                                                                      | X14480    | 1416808_at   | 0.00088  | 0.509  | 0.454 |
| Efemp2        | epidermal_growth_factor-containing_fibulin-like_extracellular_matrix_protein_2 | NM_021474 | 1417018_at   | 0.0331   | 0.576  | 0.639 |
| Fabp4         | fatty_acid_binding_protein_4_adipocyte                                         | NM_024406 | 1417023_a_at | 0.0214   | 0.282  | 0.809 |
| Ly6a          | lymphocyte_antigen_6_complex_locus_A                                           | BC002070  | 1417185_at   | 0.0159   | 0.464  | 0.728 |
| Tmsb10        | thymosin_beta_10                                                               | NM_025284 | 1417219_s_at | 0.0132   | 0.364  | 0.774 |
| Snx5          | sorting_nexin_5                                                                | NM_024225 | 1417648_s_at | 5.84E-05 | 0.266  | 0.682 |
| Tde1          | tumor_differentially_expressed_1                                               | NM_012032 | 1417815_a_at | 0.00314  | 0.456  | 0.949 |
| 3110050F08Rik | RIKEN_cDNA_3110050F08_gene                                                     | NM_024198 | 1417836_at   | 0.000658 | 0.705  | 0.375 |
| Pltp          | phospholipid_transfer_protein                                                  | NM_011125 | 1417963_at   | 0.0125   | 0.896  | 0.609 |
| Dpt           | dermatopontin                                                                  | NM_019759 | 1418511_at   | 0.00181  | 0.173  | 0.751 |
| Mmp3          | matrix_metalloproteinase_3                                                     | NM_010809 | 1418945_at   | 0.0122   | 0.0625 | 0.897 |
| D430029O09Rik | RIKEN_cDNA_D430029O09_gene                                                     | NM_022814 | 1419182_at   | 0.0126   | 0.933  | 0.465 |
| Col1a2        | procollagen_type_I_alpha_2                                                     | BF227507  | 1423110_at   | 0.00548  | 0.45   | 0.804 |
| Thy1          | thymus_cell_antigen_1_theta                                                    | AV028402  | 1423135_at   | 0.026    | 0.882  | 0.57  |
| Col1a1        | procollagen_type_I_alpha_1                                                     | U08020    | 1423669_at   | 0.0195   | 0.652  | 0.62  |
| Col4a2        | procollagen_type_IV_alpha_2                                                    | BC013560  | 1424051_at   | 0.0094   | 0.455  | 0.761 |
| 2610001E17Rik | RIKEN_cDNA_2610001E17_gene                                                     | BG074158  | 1424186_at   | 0.00738  | 0.892  | 0.692 |
| Plagl1        | pleiomorphic_adenoma_gene-like_1                                               | AF147785  | 1426208_x_at | 0.0374   | 0.574  | 0.651 |
| Col4a1        | procollagen_type_IV_alpha_1                                                    | BF158638  | 1426348_at   | 0.0194   | 0.744  | 0.688 |
| Fn1           | fibronectin_1                                                                  | BC004724  | 1426642_at   | 0.00286  | 0.311  | 0.763 |
| Col6a2        | procollagen_type_VI_alpha_2                                                    | BI455189  | 1426947_x_at | 0.00786  | 0.787  | 0.679 |
| Efemp1        | epidermal_growth_factor-containing_fibulin-like_extracellular_matrix_protein_1 | BC023060  | 1427183_at   | 0.00101  | 0.0985 | 0.668 |
| Cspg2         | chondroitin_sulfate_proteoglycan_2                                             | BM251152  | 1427256_at   | 0.00186  | 0.359  | 0.628 |
| Col3a1        | procollagen_type_III_alpha_1                                                   | AW550625  | 1427883_a_at | 0.00607  | 0.435  | 0.606 |
| 0610007L05Rik | RIKEN_cDNA_0610007L05_gene                                                     | BI328146  | 1428538_s_at | 0.00204  | 0.53   | 0.534 |
| 2610016K11Rik | RIKEN_cDNA_2610016K11_gene                                                     | BB543167  | 1433488_x_at | 0.0165   | 0.207  | 0.861 |
| Cdh5          | cadherin_5                                                                     | AW543698  | 1433956_at   | 0.00682  | 0.46   | 0.849 |
| Tcf4          | transcription_factor_4                                                         | BB364520  | 1434148_at   | 0.0184   | 0.109  | 0.893 |
| Pkig          | protein_kinase_inhibitor_gamma                                                 | AV209892  | 1434820_s_at | 0.00929  | 0.68   | 0.855 |

|               |                                                                           |           |              |          |         |        |
|---------------|---------------------------------------------------------------------------|-----------|--------------|----------|---------|--------|
| Sh3bgrl       | SH3-binding_domain_glutamic_acid-rich_protein_like                        | BB248904  | 1436997_x_at | 0.00524  | 0.151   | 0.731  |
| F2r           | coagulation_factor_II_(thrombin)_receptor                                 | AV024285  | 1437308_s_at | 0.00279  | 0.194   | 0.763  |
| Fkbp9         | FK506_binding_protein_9                                                   | BB026630  | 1437687_x_at | 0.00609  | 0.0701  | 0.593  |
| Clu           | clusterin                                                                 | AV152288  | 1437689_x_at | 0.0476   | 0.251   | 0.908  |
| Bgn           | biglycan                                                                  | AI931862  | 1437889_x_at | 0.0146   | 0.47    | 0.795  |
| Fstl1         | follistatin-like_1                                                        | BI452727  | 1448259_at   | 0.00239  | 0.402   | 0.967  |
| Bgn           | biglycan                                                                  | BC019502  | 1448323_a_at | 0.0216   | 0.417   | 0.909  |
| Sparc         | secreted_acidic_cysteine_rich_glycoprotein                                | NM_009242 | 1448392_at   | 0.0152   | 0.504   | 0.915  |
| Pcolce        | procollagen_C-proteinase_enhancer_protein                                 | NM_008788 | 1448433_a_at | 0.00387  | 0.709   | 0.706  |
| Col15a1       | procollagen,_type_XV                                                      | AF011450  | 1448755_at   | 0.0231   | 0.865   | 0.483  |
| Dcn           | decorin                                                                   | NM_007833 | 1449368_at   | 0.0103   | 0.558   | 0.695  |
| ---           | ---                                                                       | AI325255  | 1449632_s_at | 0.00408  | 0.213   | 0.879  |
| Ctsk          | cathepsin_K                                                               | NM_007802 | 1450652_at   | 0.00445  | 0.273   | 0.637  |
| Serpinh1      | serine_(or_cysteine)_proteinase_inhibitor,_clade_H,_member_1              | BI220012  | 1450843_a_at | 0.00442  | 0.507   | 0.863  |
| Col1a2        | procollagen,_type_I,_alpha_2                                              | BF227507  | 1450857_a_at | 0.00441  | 0.493   | 0.76   |
| 6330406I15Rik | RIKEN_cDNA_6330406I15_gene                                                | AK018128  | 1452244_at   | 1.15E-05 | 0.0679  | 0.978  |
| Col6a2        | procollagen,_type_VI,_alpha_2                                             | BI455189  | 1452250_a_at | 0.0072   | 0.966   | 0.708  |
| Rrbp1         | ribosome_binding_protein_1                                                | AK019964  | 1452767_at   | 0.0113   | 0.384   | 0.746  |
| 4833411K15Rik | RIKEN_cDNA_4833411K15_gene                                                | AV102733  | 1455908_a_at | 0.029    | 0.247   | 0.86   |
| Pltp          | phospholipid_transfer_protein                                             | AI591480  | 1456424_s_at | 0.000534 | 0.22    | 0.794  |
| Serpinh1      | serine_(or_cysteine)_proteinase_inhibitor,_clade_H,_member_1              | BB329489  | 1456733_x_at | 0.000729 | 0.754   | 0.947  |
| Dbp           | D_site_albumin_promoter_binding_protein                                   | BB550183  | 1438211_s_at | 0.155    | 0.00774 | 0.21   |
| Cyp2e1        | cytochrome_P450,_family_2,_subfamily_e,_polypeptide_1                     | NM_021282 | 1415994_at   | 0.0481   | 0.924   | 0.407  |
| Aqp1          | aquaporin_1                                                               | NM_007472 | 1416203_at   | 0.0389   | 0.911   | 0.33   |
| Fstl1         | follistatin-like_1                                                        | BI452727  | 1416221_at   | 0.00535  | 0.184   | 0.644  |
| Tnc           | tenascin_C                                                                | NM_011607 | 1416342_at   | 0.00172  | 0.331   | 0.508  |
| Apod          | apolipoprotein_D                                                          | NM_007470 | 1416371_at   | 0.0379   | 0.424   | 0.296  |
| Ppic          | peptidylprolyl_isomerase_C                                                | NM_008908 | 1416498_at   | 0.00555  | 0.134   | 0.551  |
| Col5a1        | procollagen,_type_V,_alpha_1                                              | AW744319  | 1416740_at   | 0.000337 | 0.868   | 0.102  |
| Tpbbp         | trophoblast_specific_protein_beta                                         | NM_007796 | 1416811_s_at | 0.000299 | 0.213   | 0.27   |
| Emp3          | epithelial_membrane_protein_3                                             | BC001999  | 1417104_at   | 0.00175  | 0.442   | 0.349  |
| Arl2bp        | ADP-ribosylation_factor-like_2_binding_protein                            | NM_024191 | 1417112_at   | 2.76E-05 | 0.926   | 0.167  |
| Pmp22         | peripheral_myelin_protein                                                 | NM_008885 | 1417133_at   | 0.00362  | 0.0909  | 0.141  |
| C1qa          | complement_component_1,_q_subcomponent,_alpha_polypeptide                 | NM_007572 | 1417381_at   | 0.0385   | 0.435   | 0.623  |
| Cp            | ceruloplasmin                                                             | BB332449  | 1417494_a_at | 0.00332  | 0.245   | 0.0649 |
| Snx5          | sorting_nexin_5                                                           | NM_024225 | 1417647_at   | 0.0018   | 0.638   | 0.348  |
| Nrp           | neuropilin                                                                | AK011144  | 1418084_at   | 0.0203   | 0.945   | 0.316  |
| Kdelr3        | KDEL_(Lys-Asp-Glu-Leu)_endoplasmic_reticulum_protein_retention_receptor_3 | NM_134090 | 1418538_at   | 0.000389 | 0.677   | 0.189  |
| Arhj          | ras_homolog_gene_family,_member_J                                         | AF309564  | 1418892_at   | 0.00378  | 0.346   | 0.342  |
| 9530081K03Rik | RIKEN_cDNA_9530081K03_gene                                                | NM_030127 | 1419292_at   | 0.000455 | 0.212   | 0.407  |
| Lgals1        | lectin,_galactose_binding,_soluble_1                                      | NM_008495 | 1419573_a_at | 0.00326  | 0.706   | 0.261  |



|               |                                                                                              |           |              |          |        |        |
|---------------|----------------------------------------------------------------------------------------------|-----------|--------------|----------|--------|--------|
| C1qr1         | complement_component_1, q_subcomponent, receptor_1                                           | BB039247  | 1419589_at   | 0.00969  | 0.92   | 0.36   |
| Col5a3        | procollagen, type V, alpha_3                                                                 | NM_016919 | 1419703_at   | 0.00897  | 0.951  | 0.28   |
| Pecam         | platelet/endothelial_cell_adhesion_molecule                                                  | NM_008816 | 1421287_a_at | 0.0377   | 0.486  | 0.223  |
| Col5a2        | procollagen, type V, alpha_2                                                                 | AV229424  | 1422437_at   | 0.002    | 0.347  | 0.534  |
| Adamts5       | a_disintegrin-like_and_metalloprotease_(reprolysin_type)_with_thrombospondin_type_1_motif, 5 | BB658835  | 1422561_at   | 0.0302   | 0.577  | 0.492  |
| Ly86          | lymphocyte_antigen_86                                                                        | NM_010745 | 1422903_at   | 0.0068   | 0.932  | 0.318  |
| Cd36          | CD36_antigen                                                                                 | BB534670  | 1423166_at   | 0.00713  | 0.502  | 0.376  |
| Myadm         | myeloid-associated_differentiation_marker                                                    | BI078799  | 1423321_at   | 0.0176   | 0.818  | 0.539  |
| Igfbp7        | insulin-like_growth_factor_binding_protein_7                                                 | AI481026  | 1423584_at   | 0.0326   | 0.897  | 0.381  |
| Lum           | lumican                                                                                      | AK014312  | 1423607_at   | 0.000414 | 0.33   | 0.18   |
| Pkig          | protein_kinase_inhibitor, gamma                                                              | BC026550  | 1423945_a_at | 0.00129  | 0.95   | 0.158  |
| BC013529      | cDNA_sequence_BC013529                                                                       | BC013529  | 1424025_at   | 0.0219   | 0.508  | 0.569  |
| Col6a3        | procollagen, type VI, alpha_3                                                                | AF064749  | 1424131_at   | 0.0135   | 0.974  | 0.449  |
| Ian1          | immune_associated_nucleotide_1                                                               | BC005577  | 1424375_s_at | 0.00154  | 0.434  | 0.251  |
| Lama4         | laminin, alpha_4                                                                             | BB053010  | 1424807_at   | 0.0128   | 0.892  | 0.279  |
| P2ry6         | pyrimidinergic_receptor_P2Y, G-protein_coupled, 6                                            | BC027331  | 1425214_at   | 0.00489  | 0.748  | 0.224  |
| Grb10         | growth_factor_receptor_bound_protein_10                                                      | AF022072  | 1425458_a_at | 0.000147 | 0.548  | 0.112  |
| Prrx1         | paired_related_homeobox_1                                                                    | L06502    | 1425528_at   | 0.00161  | 0.575  | 0.239  |
| Glul          | glutamate-ammonia_ligase_(glutamine_synthase)                                                | AI391218  | 1426236_a_at | 0.02     | 0.617  | 0.244  |
| Apbp2         | amyloid_beta_(A4)_precursor_protein-binding, family B, member_2                              | BG067463  | 1426719_at   | 0.00043  | 0.536  | 0.11   |
| Ifi205        | interferon_activated_gene_205                                                                | M74124    | 1426906_at   | 0.0222   | 0.617  | 0.499  |
| C130058N24Rik | RIKEN_cDNA_C130058N24_gene                                                                   | BC026446  | 1427020_at   | 0.00111  | 0.0491 | 0.534  |
| 1110028G01Rik | RIKEN_cDNA_1110028G01_gene                                                                   | AJ277212  | 1427201_at   | 0.00301  | 0.718  | 0.306  |
| Col3a1        | procollagen, type III, alpha_1                                                               | AW550625  | 1427884_at   | 0.00177  | 0.34   | 0.448  |
| Sh3bgrl       | SH3-binding_domain_glutamic_acid-rich_protein_like                                           | AK004519  | 1428107_at   | 0.0264   | 0.16   | 0.758  |
| Anxa6         | annexin_A6                                                                                   | AK013026  | 1429246_a_at | 0.00165  | 0.403  | 0.0996 |
| Ppap2b        | phosphatidic_acid_phosphatase_type_2B                                                        | AW111876  | 1429514_at   | 0.0154   | 0.197  | 0.629  |
| Arl2bp        | ADP-ribosylation_factor-like_2_binding_protein                                               | AK006418  | 1429859_a_at | 0.000937 | 0.578  | 0.298  |
| Plekhc1       | pleckstrin_homology_domain_containing, family C_(with_FERM_domain)_member_1                  | BG070082  | 1434180_at   | 0.00438  | 0.501  | 0.314  |
| Pcolce        | procollagen_C-proteinase_enhancer_protein                                                    | BB250811  | 1437165_a_at | 0.000153 | 0.963  | 0.222  |
| O610007L05Rik | RIKEN_cDNA_O610007L05_gene                                                                   | AV012073  | 1437902_s_at | 0.00155  | 0.441  | 0.398  |
| ---           | ---                                                                                          | BB483357  | 1438651_a_at | 0.00336  | 0.404  | 0.336  |
| Figf          | c-fos_induced_growth_factor                                                                  | BB359521  | 1438953_at   | 0.0369   | 0.561  | 0.389  |
| Figf          | c-fos_induced_growth_factor                                                                  | BB359521  | 1438954_x_at | 0.0266   | 0.399  | 0.283  |
| Lyzs          | lysozyme                                                                                     | AV058500  | 1439426_x_at | 0.009    | 0.432  | 0.339  |
| Col6a1        | procollagen, type VI, alpha_1                                                                | NM_009933 | 1448590_at   | 0.01     | 0.624  | 0.215  |
| Ifi203        | interferon_activated_gene_203                                                                | NM_008328 | 1448775_at   | 0.00659  | 0.492  | 0.402  |
| Cxcl12        | chemokine_(C-X-C_motif)_ligand_12                                                            | BC006640  | 1448823_at   | 0.00291  | 0.0608 | 0.645  |
| Nrp           | neuropilin                                                                                   | AK011144  | 1448943_at   | 0.00237  | 0.183  | 0.54   |
| Col5a2        | procollagen, type V, alpha_2                                                                 | AV229424  | 1450625_at   | 0.00136  | 0.472  | 0.433  |
| Sepp1         | selenoprotein_P, plasma, 1                                                                   | BC001991  | 1452141_a_at | 0.00457  | 0.26   | 0.579  |

|       |                                 |           |              |          |        |        |
|-------|---------------------------------|-----------|--------------|----------|--------|--------|
| Il6st | interleukin_6_signal_transducer | AK017211  | 1452843_at   | 0.00665  | 0.759  | 0.37   |
| Ndn   | necdin                          | AV124445  | 1455792_x_at | 2.81E-06 | 0.275  | 0.0253 |
| Vim   | vimentin                        | AV147875  | 1456292_a_at | 0.0046   | 0.449  | 0.519  |
| Fbn1  | fibrillin_1                     | NM_007993 | 1460208_at   | 0.000235 | 0.0603 | 0.404  |

| Cluster D  |                                                                                    | ANOVA p value |              |          |        |          |
|------------|------------------------------------------------------------------------------------|---------------|--------------|----------|--------|----------|
| Name       | Description                                                                        | NCBI          | Affy Probe   | MIF      | OVX    | Inter    |
| AW538196   | expressed_sequence_AW538196                                                        | NM_133952     | 1415866_at   | 0.0353   | 0.786  | 0.0577   |
| Gjb3       | gap_junction_membrane_channel_protein_beta_3                                       | NM_008126     | 1416715_at   | 0.0369   | 0.668  | 0.0763   |
| Fzd6       | frizzled_homolog_6_(Drosophila)                                                    | NM_008056     | 1417301_at   | 0.012    | 0.703  | 0.0451   |
| Prkcl      | protein_kinase_C_lambda                                                            | NM_008857     | 1417410_s_at | 0.0293   | 0.619  | 0.019    |
| Rab38      | Rab38_member_of_RAS_oncogene_family                                                | NM_028238     | 1417700_at   | 0.0144   | 0.531  | 0.013    |
| Ppfibp2    | protein_tyrosine_phosphatase_receptor-type_F_interacting_protein_binding_protein_2 | NM_008905     | 1417801_a_at | 0.000537 | 0.941  | 0.000512 |
| Irf6       | interferon_regulatory_factor_6                                                     | NM_016851     | 1418301_at   | 0.0462   | 0.683  | 0.0347   |
| Prss8      | protease_serine_8_(prostasin)                                                      | BC003851      | 1418320_at   | 0.00457  | 0.877  | 0.0174   |
| Notch1     | Notch_gene_homolog_1_(Drosophila)                                                  | NM_008714     | 1418634_at   | 0.0181   | 0.886  | 0.00845  |
| AI256711   | expressed_sequence_AI256711                                                        | AW475993      | 1418831_at   | 0.0286   | 0.647  | 0.0377   |
| Evpl       | envoplakin                                                                         | NM_025276     | 1419133_at   | 0.0175   | 0.674  | 0.0419   |
| Igsf9      | immunoglobulin_superfamily_member_9                                                | AF317839      | 1420518_a_at | 0.00941  | 0.796  | 0.0232   |
| Ptpnf      | protein_tyrosine_phosphatase_receptor_type_F                                       | BF235516      | 1420842_at   | 0.0378   | 0.941  | 0.0257   |
| Ptpnf      | protein_tyrosine_phosphatase_receptor_type_F                                       | BF235516      | 1420843_at   | 0.0101   | 0.957  | 0.0379   |
| Pard6g     | par-6_partitioning_defective_6_homolog_gamma_(C_elegans)                           | NM_053117     | 1420851_at   | 0.0207   | 0.806  | 0.0678   |
| Pabpn1     | poly(A)_binding_protein_nuclear_1                                                  | AV028400      | 1422849_a_at | 0.0307   | 0.836  | 0.0226   |
| AW212394   | expressed_sequence_AW212394                                                        | BF225441      | 1424463_at   | 0.0473   | 0.987  | 0.0606   |
| AW125753   | expressed_sequence_AW125753                                                        | BC002154      | 1425452_s_at | 0.0337   | 0.772  | 0.0562   |
| Alox12e    | arachidonate_lipoxygenase_epidermal                                                | U39200        | 1426039_a_at | 0.00605  | 0.301  | 0.129    |
| Hrc        | histidine_rich_calcium_binding_protein                                             | BC021623      | 1426048_s_at | 0.00694  | 0.974  | 0.0015   |
| Agrn       | agrin                                                                              | BM208224      | 1426670_at   | 0.0475   | 0.885  | 0.0413   |
| Smo        | smoothened_homolog_(Drosophila)                                                    | AW555326      | 1427049_s_at | 0.00355  | 0.0506 | 0.00471  |
| BC031593   | cDNA_sequence_BC031593                                                             | BC019155      | 1427352_at   | 0.0353   | 0.565  | 0.0945   |
| Grhl2      | grainyhead_like_2_(Drosophila)                                                     | AK005410      | 1429086_at   | 0.0483   | 0.887  | 0.0662   |
| Atp6v1c2   | ATPase_H+_transporting_V1_subunit_C_isoform_2                                      | AK004157      | 1430306_a_at | 0.00709  | 0.164  | 0.0061   |
| ErbB3      | v-erb-b2_erythroblastic_leukemia_viral_oncogene_homolog_3_(avian)                  | BF140685      | 1434606_at   | 0.0469   | 0.516  | 0.106    |
| Spint2     | serine_protease_inhibitor_Kunitz_type_2                                            | AV058358      | 1438968_x_at | 0.0391   | 0.787  | 0.0164   |
| 6330505N24 | hypothetical_protein_6330505N24                                                    | AV329790      | 1439018_at   | 0.0282   | 0.417  | 0.0277   |
| Incnp      | inner_centromere_protein                                                           | BB418702      | 1439436_x_at | 0.0235   | 0.697  | 0.0525   |
| Grb7       | growth_factor_receptor_bound_protein_7                                             | NM_010346     | 1448227_at   | 0.000421 | 0.755  | 0.00691  |
| Rassf3     | Ras_association_(RalGDS/AF-6)_domain_family_3                                      | BB703307      | 1448546_at   | 0.0397   | 0.409  | 0.316    |
| S100a14    | S100_calcium_binding_protein_A14                                                   | NM_025393     | 1449166_at   | 0.0309   | 0.944  | 0.0368   |
| Gpx2       | glutathione_peroxidase_2                                                           | NM_030677     | 1449279_at   | 0.0085   | 0.16   | 0.00676  |
| Pkp1       | plakophilin_1                                                                      | NM_019645     | 1449586_at   | 0.045    | 0.567  | 0.0858   |

|               |                                                                                      |           |              |        |        |         |
|---------------|--------------------------------------------------------------------------------------|-----------|--------------|--------|--------|---------|
| Wnt4          | wingless-related_MMTV_integration_site_4                                             | NM_009523 | 1450782_at   | 0.025  | 0.893  | 0.0376  |
| 1300006M19Rik | RIKEN_cDNA_1300006M19_gene                                                           | BC015459  | 1451539_at   | 0.0245 | 0.692  | 0.112   |
| ---           | ---                                                                                  | BC004738  | 1451895_a_at | 0.0185 | 0.526  | 0.0218  |
| AA409316      | expressed_sequence_AA409316                                                          | BB021559  | 1452273_at   | 0.0134 | 0.436  | 0.0135  |
| 2310040C09Rik | RIKEN_cDNA_2310040C09_gene                                                           | AK009716  | 1453184_at   | 0.0115 | 0.714  | 0.0134  |
| Cd9           | CD9_antigen                                                                          | NM_007657 | 1416066_at   | 0.0835 | 0.707  | 0.27    |
| Spint1        | serine_protease_inhibitor_Kunitz_type_1                                              | NM_016907 | 1416627_at   | 0.0682 | 0.637  | 0.0727  |
| Itpr3         | inositol_1,4,5-triphosphate_receptor_3                                               | NM_080553 | 1417297_at   | 0.0721 | 0.849  | 0.156   |
| Vdr           | vitamin_D_receptor                                                                   | AV290079  | 1418176_at   | 0.0808 | 0.655  | 0.0437  |
| Dgka          | diacylglycerol_kinase_alpha                                                          | BC006713  | 1418578_at   | 0.0821 | 0.232  | 0.146   |
| Bbox1         | butyrobetaine_(gamma)_2-oxoglutarate_dioxygenase_1_(gamma-butyrobetaine_hydroxylase) | NM_130452 | 1419618_at   | 0.0551 | 0.0923 | 0.184   |
| Il17rc        | interleukin_17_receptor_C                                                            | NM_134159 | 1419671_a_at | 0.0521 | 0.247  | 0.0991  |
| Cyp2b19       | cytochrome_P450_family_2_subfamily_b_polypeptide_19                                  | NM_007814 | 1419731_at   | 0.0584 | 0.924  | 0.178   |
| Zfp185        | zinc_finger_protein_185                                                              | AK014497  | 1420944_at   | 0.0778 | 0.496  | 0.0229  |
| Defb6         | defensin_beta_6                                                                      | NM_054074 | 1421807_at   | 0.0694 | 0.917  | 0.131   |
| Krt1-15       | keratin_complex_1_acidic_gene_15                                                     | NM_008469 | 1422667_at   | 0.0627 | 0.185  | 0.283   |
| Tacstd2       | tumor-associated_calcium_signal_transducer_2                                         | AV241768  | 1423323_at   | 0.0809 | 0.588  | 0.0117  |
| Krt2-6g       | keratin_complex_2_basic_gene_6g                                                      | BC006780  | 1424096_at   | 0.0973 | 0.334  | 0.212   |
| Trim29        | tripartite_motif_protein_29                                                          | BC027353  | 1424162_at   | 0.0978 | 0.85   | 0.145   |
| Homer2        | homer_homolog_2_(Drosophila)                                                         | AB017136  | 1424367_a_at | 0.0702 | 0.0644 | 0.00273 |
| Bnc           | basonuclin                                                                           | U88064    | 1424890_at   | 0.0581 | 0.377  | 0.0296  |
| BC017147      | cDNA_sequence_BC017147                                                               | BC017147  | 1425558_at   | 0.0797 | 0.752  | 0.0489  |
| Tbx1          | T-box_1                                                                              | AF326960  | 1425779_a_at | 0.0926 | 0.382  | 0.0241  |
| Jag2          | jagged_2                                                                             | AV264681  | 1426431_at   | 0.0826 | 0.224  | 0.0543  |
| 3830613O22Rik | RIKEN_cDNA_3830613O22_gene                                                           | BC019649  | 1426782_at   | 0.0581 | 0.861  | 0.0127  |
| LOC214531     | mosaic_serine_protease-like                                                          | BF138523  | 1427477_at   | 0.0687 | 0.115  | 0.107   |
| Nfatc3        | nuclear_factor_of_activated_T-cells_cytoplasmic_3                                    | BF124648  | 1433683_at   | 0.0891 | 0.56   | 0.119   |
| Nos3          | nitric_oxide_synthase_3_endothelial_cell                                             | AW121498  | 1434092_at   | 0.0553 | 0.867  | 0.128   |
| Cldn1         | claudin_1                                                                            | AV227581  | 1437932_a_at | 0.0994 | 0.934  | 0.0348  |
| Syt1          | synaptotagmin-like_1                                                                 | NM_031393 | 1450240_a_at | 0.0633 | 0.587  | 0.0985  |
| Kif21a        | kinesin_family_member_21A                                                            | NM_016705 | 1450738_at   | 0.0575 | 0.686  | 0.148   |
| BC031468      | cDNA_sequence_BC031468                                                               | BG070112  | 1454681_at   | 0.0557 | 0.962  | 0.0549  |
| Krt1-14       | keratin_complex_1_acidic_gene_14                                                     | BE197934  | 1455573_at   | 0.0533 | 0.207  | 0.523   |

| Cluster E     |                                           | ANOVA p value |              |         |       |        |
|---------------|-------------------------------------------|---------------|--------------|---------|-------|--------|
| Name          | Description                               | NCBI          | Affy Probe   | MIF     | OVX   | Inter  |
| 1600029D21Rik | RIKEN_cDNA_1600029D21_gene                | BC022950      | 1423933_a_at | 0.00332 | 0.064 | 0.196  |
| Sdc1          | syndecan_1                                | BI788645      | 1415943_at   | 0.0987  | 0.424 | 0.22   |
| Dnajb1        | DnaJ_(Hsp40)_homolog_subfamily_B_member_1 | AK002290      | 1416755_at   | 0.0713  | 0.137 | 0.0597 |
| Efna1         | ephrin_A1                                 | D38146        | 1416895_at   | 0.0738  | 0.227 | 0.0487 |
| Prom2         | prominin_2                                | AF269062      | 1417047_at   | 0.0503  | 0.598 | 0.167  |

|               |                                                                                                    |           |              |         |        |        |
|---------------|----------------------------------------------------------------------------------------------------|-----------|--------------|---------|--------|--------|
| Slc40a1       | solute_carrier_family_40_(iron-regulated_transporter),_member_1                                    | AF226613  | 1417061_at   | 0.0969  | 0.287  | 0.104  |
| Peli1         | pellino_1                                                                                          | BC016515  | 1417371_at   | 0.0529  | 0.77   | 0.348  |
| Rai14         | retinoic_acid_induced_14                                                                           | NM_030690 | 1417400_at   | 0.869   | 0.0812 | 0.0409 |
| Insig2        | insulin_induced_gene_2                                                                             | AV257512  | 1417981_at   | 0.0793  | 0.316  | 0.107  |
| Fem1b         | feminization_1_homolog_b_(C._elegans)                                                              | BM232562  | 1418324_at   | 0.355   | 0.0777 | 0.147  |
| Lad1          | ladinin                                                                                            | NM_133664 | 1418449_at   | 0.0686  | 0.823  | 0.143  |
| Al256711      | expressed_sequence_Al256711                                                                        | AW475993  | 1418832_at   | 0.0694  | 0.61   | 0.285  |
| Fgfbp1        | fibroblast_growth_factor_binding_protein_1                                                         | U49641    | 1419086_at   | 0.0899  | 0.791  | 0.299  |
| Cstb          | cystatin_B                                                                                         | NM_007793 | 1422507_at   | 0.0833  | 0.218  | 0.335  |
| Foxq1         | forkhead_box_Q1                                                                                    | NM_008239 | 1422735_at   | 0.0773  | 0.156  | 0.219  |
| Clk3          | CDC-like_kinase_3                                                                                  | AF033565  | 1423849_a_at | 0.0942  | 0.849  | 0.287  |
| Ptgds         | prostaglandin_D2_synthase_(brain)                                                                  | AB006361  | 1423860_at   | 0.0835  | 0.731  | 0.128  |
| Ptger4        | prostaglandin_E_receptor_4_(subtype_EP4)                                                           | BC011193  | 1424208_at   | 0.0893  | 0.114  | 0.046  |
| 9030407H20Rik | RIKEN_cDNA_9030407H20_gene                                                                         | BC019416  | 1424966_at   | 0.0526  | 0.861  | 0.474  |
| 2300002L21Rik | RIKEN_cDNA_2300002L21_gene                                                                         | BC020031  | 1425560_a_at | 0.0755  | 0.47   | 0.351  |
| Alcam         | activated_leukocyte_cell_adhesion_molecule                                                         | U95030    | 1426301_at   | 0.0715  | 0.133  | 0.0824 |
| Jag2          | jagged_2                                                                                           | AV264681  | 1426430_at   | 0.0623  | 0.67   | 0.231  |
| Pawr          | PRKC,_apoptosis,_WT1,_regulator                                                                    | BB398886  | 1426910_at   | 0.0743  | 0.276  | 0.0609 |
| 2310047E01Rik | RIKEN_cDNA_2310047E01_gene                                                                         | AK009873  | 1428485_at   | 0.0599  | 0.834  | 0.24   |
| 2310040C09Rik | RIKEN_cDNA_2310040C09_gene                                                                         | AK009716  | 1429536_at   | 0.0645  | 0.321  | 0.122  |
| Slc25a6       | solute_carrier_family_25_(mitochondrial_carrier;_phosphate_carrier),_member_26                     | AV174595  | 1434210_s_at | 0.0806  | 0.195  | 0.0801 |
| Unc5b         | unc-5_homolog_B_(C._elegans)                                                                       | BG065285  | 1435110_at   | 0.0851  | 0.305  | 0.157  |
| 4930534K13Rik | RIKEN_cDNA_4930534K13_gene                                                                         | BG064140  | 1435226_at   | 0.0804  | 0.989  | 0.549  |
| D12Wsu95e     | DNA_segment,_Chr_12,_Wayne_State_University_95,_expressed                                          | BM194994  | 1437545_at   | 0.0921  | 0.122  | 0.2    |
| ---           | Mus_musculus_transcribed_sequences                                                                 | BB092799  | 1438244_at   | 0.0874  | 0.35   | 0.424  |
| ---           | Mus_musculus_adult_male_corpus_striatum_cDNA,_RIKEN_full-length_enriched_library,_clone:C030039M13 | BB111454  | 1439411_a_at | 0.0913  | 0.75   | 0.539  |
| Xpo5          | exportin_5                                                                                         | AL024089  | 1449648_s_at | 0.0524  | 0.276  | 0.148  |
| Fzd7          | frizzled_homolog_7_(Drosophila)                                                                    | NM_008057 | 1450044_at   | 0.366   | 0.0705 | 0.0253 |
| Idi1          | isopentenyl-diphosphate_delta_isomerase                                                            | BC004801  | 1451122_at   | 0.0853  | 0.555  | 0.213  |
| Tgm1          | transglutaminase_1,_K_polypeptide                                                                  | BC026422  | 1451416_a_at | 0.0732  | 0.505  | 0.452  |
| Spint2        | serine_protease_inhibitor,_Kunitz_type_2                                                           | AF099020  | 1451935_a_at | 0.0709  | 0.249  | 0.0902 |
| LOC212285     | hypothetical_protein_LOC212285                                                                     | AV375176  | 1452291_at   | 0.0734  | 0.861  | 0.14   |
| B830009D23Rik | RIKEN_cDNA_B830009D23_gene                                                                         | BB667368  | 1455350_at   | 0.0886  | 0.627  | 0.132  |
| Cxcl14        | chemokine_(C-X-C_motif)_ligand_14                                                                  | AF252873  | 1418456_a_at | 0.211   | 0.0203 | 0.0518 |
| Efnb2         | ephrin_B2                                                                                          | U30244    | 1419639_at   | 0.102   | 0.0459 | 0.0293 |
| Gclc          | glutamate-cysteine_ligase,_catalytic_subunit                                                       | BC019374  | 1424296_at   | 0.042   | 0.126  | 0.247  |
| Katna1        | katanin_p60_(ATPase-containing)_subunit_A1                                                         | AK012319  | 1450949_at   | 0.00965 | 0.195  | 0.218  |
| Tpm1          | tropomyosin_1,_alpha                                                                               | BM232388  | 1456623_at   | 0.0582  | 0.043  | 0.174  |
| Sdc1          | syndecan_1                                                                                         | BI788645  | 1415944_at   | 0.039   | 0.154  | 0.0226 |
| Nrarp         | Notch-regulated_ankyrin_repeat_protein                                                             | BI696369  | 1417985_at   | 0.0291  | 0.535  | 0.148  |
| St14          | suppression_of_tumorigenicity_14_(colon_carcinoma)                                                 | NM_011176 | 1418076_at   | 0.0354  | 0.518  | 0.0755 |

|               |                                                                                           |           |              |          |        |         |
|---------------|-------------------------------------------------------------------------------------------|-----------|--------------|----------|--------|---------|
| Efnb1         | ephrin_B1                                                                                 | NM_010110 | 1418285_at   | 0.0325   | 0.23   | 0.0499  |
| Epb4.1l4b     | erythrocyte_protein_band_4.1-like_4b                                                      | NM_019427 | 1418294_at   | 0.00727  | 0.426  | 0.0339  |
| Lhx2          | LIM_homeobox_protein_2                                                                    | NM_010710 | 1418317_at   | 0.0319   | 0.243  | 0.0265  |
| ---           | Mus_musculus_transcribed_sequence_with_weak_similarity_to_protein_pir:l58401_(M.musculus) | AW556821  | 1419033_at   | 0.0243   | 0.836  | 0.113   |
| Foxc1         | forkhead_box_C1                                                                           | BB759833  | 1419485_at   | 0.0121   | 0.371  | 0.0707  |
| Jag1          | jagged_1                                                                                  | AA880220  | 1421106_at   | 0.00171  | 0.105  | 0.0613  |
| Tcfap2a       | transcription_factor_AP-2,_alpha                                                          | NM_011547 | 1421996_at   | 0.0367   | 0.487  | 0.0647  |
| Mte1          | mitochondrial_acyl-CoA_thioesterase_1                                                     | NM_134188 | 1422997_s_at | 0.0141   | 0.211  | 0.109   |
| Tcfap2b       | transcription_factor_AP-2_beta                                                            | AV334599  | 1423340_at   | 0.0212   | 0.47   | 0.505   |
| Hras1         | Harvey_rat_sarcoma_virus_oncogene_1                                                       | BC011083  | 1424132_at   | 0.0234   | 0.449  | 0.0536  |
| 6230410J09Rik | RIKEN_cDNA_6230410J09_gene                                                                | BC021308  | 1424895_at   | 0.0119   | 0.0375 | 0.00454 |
| Sox9          | SRY-box_containing_gene_9                                                                 | BC024958  | 1424950_at   | 0.0123   | 0.0781 | 0.00754 |
| Ace2          | angiotensin_I_converting_enzyme_(peptidyl-dipeptidase_A)_2                                | AB053181  | 1425103_at   | 0.0327   | 0.222  | 0.111   |
| BC037006      | cDNA_sequence_BC037006                                                                    | BQ176786  | 1427261_at   | 0.00067  | 0.708  | 0.063   |
| Egr2          | early_growth_response_2                                                                   | X06746    | 1427683_at   | 0.00669  | 0.772  | 0.137   |
| Celsr2        | cadherin_EGF_LAG_seven-pass_G-type_receptor_2                                             | AW553336  | 1435336_at   | 0.00499  | 0.797  | 0.0607  |
| hr            | hairless                                                                                  | AV231755  | 1435950_at   | 0.000246 | 0.42   | 0.0307  |
| Tnk2          | tyrosine_kinase,_non-receptor,_2                                                          | NM_016788 | 1448297_a_at | 0.0157   | 0.426  | 0.0814  |
| Dnajb10       | DnaJ_(Hsp40)_homolog,_subfamily_B,_member_10                                              | NM_020266 | 1448657_a_at | 0.0376   | 0.353  | 0.146   |
| Dsg2          | desmoglein_2                                                                              | C79957    | 1449740_s_at | 0.026    | 0.641  | 0.076   |
| Gpr49         | G_protein-coupled_receptor_49                                                             | BB751088  | 1450988_at   | 0.00934  | 0.289  | 0.0585  |
| Sc5d          | sterol-C5-desaturase_(fungal_ERG3,_delta-5-desaturase)_homolog_(S._cerevisae)             | AB016248  | 1451457_at   | 0.0126   | 0.415  | 0.209   |
| 9030407H20Rik | RIKEN_cDNA_9030407H20_gene                                                                | BC019416  | 1451546_s_at | 0.00757  | 0.93   | 0.0921  |
| 4930538C18Rik | RIKEN_cDNA_4930538C18_gene                                                                | AV317107  | 1451717_s_at | 0.0219   | 0.622  | 0.227   |
| 2300002F06Rik | RIKEN_cDNA_2300002F06_gene                                                                | BC024546  | 1451776_s_at | 0.000691 | 0.485  | 0.0111  |
| Blnk          | B-cell_linker                                                                             | AF068182  | 1451780_at   | 0.0476   | 0.308  | 0.0544  |
| Sep5          | septin_5                                                                                  | AF033350  | 1452357_at   | 0.0465   | 0.895  | 0.162   |
| Sostdc1       | sclerostin_domain_containing_1                                                            | BC021458  | 1460250_at   | 0.000575 | 0.283  | 0.0268  |

| Cluster F |                                                 | ANOVA p value |              |        |        |        |
|-----------|-------------------------------------------------|---------------|--------------|--------|--------|--------|
| Name      | Description                                     | NCBI          | Affy Probe   | MIF    | OVX    | Inter  |
| Foxa1     | forkhead_box_A1                                 | NM_008259     | 1418496_at   | 0.847  | 0.0416 | 0.0914 |
| Junb      | Jun-B_oncogene                                  | NM_008416     | 1415899_at   | 0.0524 | 0.91   | 0.878  |
| Mlp       | MARCKS-like_protein                             | NM_010807     | 1415922_s_at | 0.069  | 0.828  | 0.631  |
| Btg2      | B-cell_translocation_gene_2,_anti-proliferative | NM_007570     | 1416250_at   | 0.0734 | 0.986  | 0.703  |
| Ets2      | E26_avian_leukemia_oncogene_2,_3'_domain        | BC005486      | 1416268_at   | 0.0991 | 0.376  | 0.862  |
| Egr1      | early_growth_response_1                         | NM_007913     | 1417065_at   | 0.0702 | 0.799  | 0.909  |
| Irf7      | interferon_regulatory_factor_7                  | NM_016850     | 1417244_a_at | 0.073  | 0.569  | 0.647  |
| Mmp13     | matrix_metalloproteinase_13                     | NM_008607     | 1417256_at   | 0.0829 | 0.719  | 0.546  |
| Olf56     | olfactory_receptor_56                           | NM_008330     | 1417292_at   | 0.0503 | 0.412  | 0.228  |
| Il15      | interleukin_15                                  | NM_008357     | 1418219_at   | 0.0798 | 0.345  | 0.457  |

|               |                                                                               |           |              |         |        |       |
|---------------|-------------------------------------------------------------------------------|-----------|--------------|---------|--------|-------|
| Gbp2          | guanylate_nucleotide_binding_protein_2                                        | NM_010260 | 1418240_at   | 0.0692  | 0.595  | 0.277 |
| Rdh11         | retinol_dehydrogenase_11                                                      | AB030503  | 1418760_at   | 0.087   | 0.818  | 0.763 |
| ---           | ---                                                                           | NM_011087 | 1418809_at   | 0.0599  | 0.44   | 0.148 |
| Arg2          | arginase_type_II                                                              | NM_009705 | 1418847_at   | 0.0815  | 0.592  | 0.464 |
| Cxcl10        | chemokine_(C-X-C_motif)_ligand_10                                             | NM_021274 | 1418930_at   | 0.0565  | 0.81   | 0.46  |
| Ltb           | lymphotoxin_B                                                                 | NM_008518 | 1419135_at   | 0.0709  | 0.702  | 0.299 |
| Klf7          | Kruppel-like_factor_7_(ubiquitous)                                            | BB524597  | 1419356_at   | 0.0964  | 0.504  | 0.263 |
| Tpd52         | tumor_protein_D52                                                             | BC002036  | 1419493_a_at | 0.0812  | 0.686  | 0.5   |
| 1110035O14Rik | RIKEN_cDNA_1110035O14_gene                                                    | NM_010268 | 1420342_at   | 0.0759  | 0.74   | 0.2   |
| 2510004L01Rik | RIKEN_cDNA_2510004L01_gene                                                    | BB741897  | 1421008_at   | 0.056   | 0.957  | 0.481 |
| Ccl4          | chemokine_(C-C_motif)_ligand_4                                                | AF128218  | 1421578_at   | 0.0543  | 0.959  | 0.262 |
| Nedd9         | neural_precursor_cell_expressed,_developmentally_down-regulated_gene_9        | NM_017464 | 1422818_at   | 0.0818  | 0.96   | 0.374 |
| Rdh12         | retinol_dehydrogenase_12                                                      | BC016204  | 1424256_at   | 0.0713  | 0.144  | 0.804 |
| Smox          | spermine_oxidase                                                              | BC004831  | 1424268_at   | 0.0745  | 0.332  | 0.501 |
| Oasl1         | 2'-5'_oligoadenylate_synthetase-like_1                                        | AB067533  | 1424339_at   | 0.0582  | 0.711  | 0.851 |
| Fcrl3         | Fc_receptor-like_3                                                            | BC027310  | 1425225_at   | 0.0879  | 0.464  | 0.339 |
| Cias1         | cold_autoinflammatory_syndrome_1_homolog_(human)                              | AF486632  | 1425412_at   | 0.0621  | 0.348  | 0.165 |
| Sln4          | schlafen_4                                                                    | AF099975  | 1427102_at   | 0.0987  | 0.497  | 0.369 |
| 1110003B01Rik | RIKEN_cDNA_1110003B01_gene                                                    | AK010339  | 1428319_at   | 0.0796  | 0.538  | 0.509 |
| Rnf149        | ring_finger_protein_149                                                       | T12280    | 1429321_at   | 0.0787  | 0.861  | 0.848 |
| G1p2          | interferon,_alpha-inducible_protein                                           | AK019325  | 1431591_s_at | 0.0934  | 0.858  | 0.637 |
| Cd80          | CD80_antigen                                                                  | AK019867  | 1432826_a_at | 0.0841  | 0.655  | 0.948 |
| Mbp           | myelin_basic_protein                                                          | AI323506  | 1433532_a_at | 0.157   | 0.0907 | 0.15  |
| Lyst          | lysosomal_trafficking_regulator                                               | BB463428  | 1434674_at   | 0.0963  | 0.771  | 0.726 |
| 5830484A20Rik | RIKEN_cDNA_5830484A20_gene                                                    | BB548008  | 1435660_at   | 0.0913  | 0.807  | 0.639 |
| Brd2          | bromodomain_containing_2                                                      | AI506310  | 1437210_a_at | 0.0587  | 0.553  | 0.379 |
| Btg2          | B-cell_translocation_gene_2,_anti-proliferative                               | NM_007570 | 1448272_at   | 0.096   | 0.373  | 0.883 |
| Nfkbia        | nuclear_factor_of_kappa_light_chain_gene_enhancer_in_B-cells_inhibitor,_alpha | NM_010907 | 1448306_at   | 0.0687  | 0.48   | 0.458 |
| AA408868      | expreeexpressed_sequence_AA408868                                             | AB026551  | 1448728_a_at | 0.0734  | 0.626  | 0.636 |
| Ifit3         | interferon-induced_protein_with_tetratricopeptide_repeats_3                   | NM_010501 | 1449025_at   | 0.0931  | 0.716  | 0.55  |
| Sln3          | schlafen_3                                                                    | NM_011409 | 1450322_s_at | 0.0876  | 0.796  | 0.321 |
| Gadd45b       | growth_arrest_and_DNA-damage-inducible_45_beta                                | AK010420  | 1450971_at   | 0.0586  | 0.994  | 0.534 |
| Alas2         | aminolevulinic_acid_synthase_2,_erythroid                                     | M63244    | 1451675_a_at | 0.0896  | 0.629  | 0.916 |
| BC013672      | cDNA_sequence_BC013672                                                        | BC013672  | 1451777_at   | 0.084   | 0.756  | 0.221 |
| Tap1          | transporter_1,_ATP-binding_cassette,_sub-family_B_(MDR/TAP)                   | AW048052  | 1416016_at   | 0.03    | 0.926  | 0.805 |
| Gsta4         | glutathione_S-transferase,_alpha_4                                            | NM_010357 | 1416368_at   | 0.00182 | 0.983  | 0.693 |
| Ier2          | immediate_early_response_2                                                    | NM_010499 | 1416442_at   | 0.0178  | 0.851  | 0.747 |
| Glx1          | glutaredoxin_1_(thioltransferase)                                             | AF276917  | 1416592_at   | 0.047   | 0.869  | 0.204 |
| Samhd1        | SAM_domain_and_HD_domain,_1                                                   | NM_018851 | 1418131_at   | 0.0378  | 0.298  | 0.176 |
| H2-Q7         | histocompatibility_2,_Q_region_locus_7                                        | M29881    | 1418536_at   | 0.00183 | 0.189  | 0.603 |
| Daxx          | Fas_death_domain-associated_protein                                           | NM_007829 | 1419026_at   | 0.0229  | 0.635  | 0.321 |

|               |                                                                       |           |              |          |        |        |
|---------------|-----------------------------------------------------------------------|-----------|--------------|----------|--------|--------|
| Isg20         | interferon-stimulated_protein                                         | BC022751  | 1419569_a_at | 0.0279   | 0.634  | 0.247  |
| Tnf           | tumor_necrosis_factor                                                 | NM_013693 | 1419607_at   | 0.0166   | 0.317  | 0.0481 |
| Pdcd1lg1      | programmed_cell_death_1_ligand_1                                      | NM_021893 | 1419714_at   | 0.0324   | 0.469  | 0.256  |
| Gbp1          | guanylate_nucleotide_binding_protein_1                                | NM_010259 | 1420549_at   | 0.0388   | 0.754  | 0.325  |
| 2510004L01Rik | RIKEN_cDNA_2510004L01_gene                                            | BB741897  | 1421009_at   | 0.0326   | 0.949  | 0.377  |
| Cdkn1a        | cyclin-dependent_kinase_inhibitor_1A_(P21)                            | NM_007669 | 1421679_a_at | 0.0316   | 0.619  | 0.927  |
| Nedd4         | neural_precursor_cell_expressed,_developmentally_down-regulted_gene_4 | NM_010890 | 1421955_a_at | 0.00105  | 0.0595 | 0.882  |
| ---           | Mus_musculus_cDNA_clone_MGC:73493_IMAGE:6813048,_complete_cds         | AW549928  | 1423071_x_at | 0.0174   | 0.306  | 0.729  |
| 6720475J19Rik | RIKEN_cDNA_6720475J19_gene                                            | AW549928  | 1423072_at   | 0.00617  | 0.941  | 0.0871 |
| Cdkn1a        | cyclin-dependent_kinase_inhibitor_1A_(P21)                            | AK007630  | 1424638_at   | 0.0179   | 0.909  | 0.842  |
| Sorl1         | sortilin-related_receptor,_LDLR_class_A_repeats-containing            | BI648081  | 1426258_at   | 0.0202   | 0.239  | 0.577  |
| Ccr12         | chemokine_(C-C_motif)_receptor-like_2                                 | AJ318863  | 1427736_a_at | 0.0165   | 0.631  | 0.539  |
| 1110008K06Rik | RIKEN_cDNA_1110008K06_gene                                            | AK003586  | 1428346_at   | 0.029    | 0.7    | 0.567  |
| Pim1          | proviral_integration_site_1                                           | AI323550  | 1435458_at   | 0.0413   | 0.701  | 0.627  |
| 2510004L01Rik | RIKEN_cDNA_2510004L01_gene                                            | BB132493  | 1436058_at   | 0.0363   | 0.671  | 0.384  |
| ---           | ---                                                                   | AA798895  | 1436362_x_at | 0.0479   | 0.866  | 0.2    |
| Axot          | axotrophin                                                            | BE288026  | 1436893_a_at | 0.0454   | 0.525  | 0.851  |
| Slc20a1       | solute_carrier_family_20,_member_1                                    | BB465699  | 1438824_at   | 0.0477   | 0.673  | 0.716  |
| Ddx6          | DEAD_(Asp-Glu-Ala-Asp)_box_polypeptide_6                              | BF226295  | 1439122_at   | 0.0233   | 0.381  | 0.954  |
| Myd116        | myeloid_differentiation_primary_response_gene_116                     | NM_008654 | 1448325_at   | 0.047    | 0.424  | 0.772  |
| Sdc4          | syndecan_4                                                            | BC005679  | 1448793_a_at | 0.00184  | 0.504  | 0.847  |
| ---           | ---                                                                   | AI323528  | 1449773_s_at | 0.0304   | 0.27   | 0.751  |
| Thbs1         | thrombospondin_1                                                      | AI385532  | 1450377_at   | 0.0365   | 0.761  | 0.271  |
| Ifit1         | interferon-induced_protein_with_tetratricopeptide_repeats_1           | NM_008331 | 1450783_at   | 0.0452   | 0.447  | 0.58   |
| Klf5          | Kruppel-like_factor_5                                                 | BC006646  | 1451739_at   | 0.0461   | 0.872  | 0.71   |
| Thbs1         | thrombospondin_1                                                      | AI385532  | 1460302_at   | 0.0102   | 0.692  | 0.486  |
| Dhcr24        | 24-dehydrocholesterol_reductase                                       | BG295389  | 1418129_at   | 0.000584 | 0.063  | 0.22   |

| Cluster G     |                                                        | ANOVA p value |              |        |         |       |
|---------------|--------------------------------------------------------|---------------|--------------|--------|---------|-------|
| Name          | Description                                            | NCBI          | Affy Probe   | MIF    | OVX     | Inter |
| Gilz          | glucocorticoid-induced_leucine_zipper                  | NM_010286     | 1420772_a_at | 0.191  | 0.0207  | 0.108 |
| Fkbp5         | FK506_binding_protein_5                                | U16959        | 1416125_at   | 0.714  | 0.00925 | 0.235 |
| Cyp17a1       | cytochrome_P450,_family_17,_subfamily_a,_polypeptide_1 | NM_007809     | 1417017_at   | 0.403  | 0.0106  | 0.976 |
| Akr1c18       | aldo-keto_reductase_family_1,_member_C18               | NM_134066     | 1419136_at   | 0.193  | 3.4E-05 | 0.808 |
| Gp38          | glycoprotein_38                                        | NM_010329     | 1419309_at   | 0.521  | 0.0418  | 0.249 |
| Cyp2g1        | cytochrome_P450,_family_2,_subfamily_g,_polypeptide_1  | NM_013809     | 1449565_at   | 0.616  | 0.0009  | 0.738 |
| Abhd1         | abhydrolase_domain_containing_1                        | BB225012      | 1456037_x_at | 0.346  | 0.0309  | 0.262 |
| Sesn1         | sestrin_1                                              | BG076140      | 1433711_s_at | 0.739  | 0.0553  | 0.486 |
| 2610524G07Rik | RIKEN_cDNA_2610524G07_gene                             | AV111335      | 1439253_x_at | 0.0901 | 0.668   | 0.178 |
| 1200003E16Rik | RIKEN_cDNA_1200003E16_gene                             | AK004560      | 1452714_at   | 0.397  | 0.0695  | 0.152 |

| Cluster H     |                                                                                    | ANOVA p value |              |       |         |       |
|---------------|------------------------------------------------------------------------------------|---------------|--------------|-------|---------|-------|
| Name          | Description                                                                        | NCBI          | Affy Probe   | MIF   | OVX     | Inter |
| Cpd           | carboxypeptidase_D                                                                 | NM_007754     | 1418018_at   | 0.662 | 0.0773  | 0.839 |
| 2210401K01Rik | RIKEN_cDNA_2210401K01_gene                                                         | AF146523      | 1418189_s_at | 0.548 | 0.0542  | 0.998 |
| Sprr2d        | small_proline-rich_protein_2D                                                      | NM_011470     | 1420771_at   | 0.28  | 0.0928  | 0.325 |
| Aqp3          | aquaporin_3                                                                        | AF104416      | 1422008_a_at | 0.549 | 0.0664  | 0.967 |
| Pten          | phosphatase_and_tensin_homolog                                                     | AA214868      | 1422553_at   | 0.713 | 0.0774  | 0.417 |
| lapp          | islet_amyloid_polypeptide                                                          | BM569571      | 1423509_a_at | 0.884 | 0.0849  | 0.025 |
| 1110001C20Rik | RIKEN_cDNA_1110001C20_gene                                                         | BG797423      | 1437288_at   | 0.435 | 0.0657  | 0.923 |
| Tra1          | tumor_rejection_antigen_gp96                                                       | BE995678      | 1438040_a_at | 0.443 | 0.074   | 0.908 |
| 2210401K01Rik | RIKEN_cDNA_2210401K01_gene                                                         | BF537798      | 1438403_s_at | 0.719 | 0.0596  | 0.855 |
| Rab6          | RAB6_member_RAS_oncogene_family                                                    | NM_024287     | 1448304_a_at | 0.729 | 0.0888  | 0.878 |
| ---           | ---                                                                                | AU018141      | 1453238_s_at | 0.477 | 0.0728  | 0.255 |
| C77892        | expressed_sequence_C77892                                                          | AW554765      | 1456112_at   | 0.417 | 0.0524  | 0.907 |
| Cox7a2        | cytochrome_c_oxidase_subunit_VIIa_2                                                | BE986812      | 1416447_at   | 0.52  | 0.00963 | 0.897 |
| 2210401K01Rik | RIKEN_cDNA_2210401K01_gene                                                         | AF146523      | 1418188_a_at | 0.581 | 0.017   | 0.968 |
| Cxcl14        | chemokine_(C-X-C_motif)_ligand_14                                                  | AF252873      | 1418457_at   | 0.529 | 0.00562 | 0.102 |
| Csnk2a1       | casein_kinase_II_alpha_1_polypeptide                                               | BB283759      | 1419038_a_at | 0.179 | 0.0113  | 0.818 |
| Spnb2         | spectrin_beta_2                                                                    | BM213516      | 1419256_at   | 0.679 | 0.0165  | 0.867 |
| Cald1         | caldesmon_1                                                                        | BI248947      | 1424768_at   | 0.329 | 0.0481  | 0.517 |
| Snx6          | sorting_nexin_6                                                                    | BC025911      | 1425148_a_at | 0.462 | 0.0266  | 0.549 |
| Galnt2        | UDP-N-acetyl-alpha-D-galactosamine:polypeptide_N-acetylgalactosaminyltransferase_2 | BG064057      | 1426756_at   | 0.301 | 0.0397  | 0.478 |
| Inhbb         | inhibin_beta-B                                                                     | BB253137      | 1426858_at   | 0.287 | 0.0421  | 0.984 |
| Smc4l1        | SMC4_structural_maintenance_of_chromosomes_4-like_1_(yeast)                        | BI665568      | 1427275_at   | 0.696 | 0.0453  | 0.537 |
| Prkwnk1       | protein_kinase_lysin_deficient_1                                                   | BI692255      | 1436746_at   | 0.238 | 0.0192  | 0.349 |
| Pum1          | pumilio_1_(Drosophila)                                                             | BB314559      | 1456054_a_at | 0.948 | 0.0117  | 0.943 |
| Narg1         | NMDA_receptor-regulated_gene_1                                                     | BG067031      | 1418024_at   | 0.444 | 0.0278  | 0.433 |
| 2310067E08Rik | RIKEN_cDNA_2310067E08_gene                                                         | BF168366      | 1426541_a_at | 0.584 | 0.0229  | 0.284 |
