# Supplementary material
Source: PubMed Central journal article supplement (PMC1613193)
Supplement: amjpathol_167_6_1561__3.pdf [file amjpathol_167_6_1561__3.pdf]

**Cluster A**

| <b>System</b>      | <b>Category</b>                   | <b>LH</b> | <b>LT</b> | <b>PH</b> | <b>PT</b> | <b>EASE Score</b> | <b>Fisher Exact</b> |
|--------------------|-----------------------------------|-----------|-----------|-----------|-----------|-------------------|---------------------|
| biological_process | regulation of muscle contraction  | 4         | 67        | 15        | 7524      | 0.000272          | 0.00000728          |
| cellular_component | sarcomere                         | 5         | 67        | 38        | 7778      | 0.000281          | 0.0000164           |
| cellular_component | myofibril                         | 5         | 67        | 39        | 7778      | 0.000311          | 0.0000187           |
| cellular_component | muscle fiber                      | 5         | 67        | 40        | 7778      | 0.000344          | 0.0000212           |
| cellular_component | extracellular                     | 33        | 67        | 2250      | 7778      | 0.000586          | 0.000336            |
| biological_process | muscle contraction                | 5         | 67        | 45        | 7524      | 0.000614          | 0.0000446           |
| cellular_component | extracellular space               | 31        | 67        | 2116      | 7778      | 0.00107           | 0.000615            |
| biological_process | muscle development                | 5         | 67        | 72        | 7524      | 0.00355           | 0.000425            |
| cellular_component | actin cytoskeleton                | 6         | 67        | 123       | 7778      | 0.00377           | 0.000628            |
| cellular_component | striated muscle thin filament     | 3         | 67        | 13        | 7778      | 0.00521           | 0.000164            |
| molecular_function | isomerase activity                | 5         | 67        | 90        | 8294      | 0.0056            | 0.000765            |
| molecular_function | cytokine binding                  | 4         | 67        | 52        | 8294      | 0.00806           | 0.000787            |
| biological_process | cell motility                     | 6         | 67        | 151       | 7524      | 0.0102            | 0.00215             |
| biological_process | defense response                  | 10        | 67        | 434       | 7524      | 0.0129            | 0.00472             |
| molecular_function | intramolecular isomerase activity | 3         | 67        | 23        | 8294      | 0.0142            | 0.000795            |
| cellular_component | endoplasmic reticulum             | 8         | 67        | 310       | 7778      | 0.0155            | 0.0049              |
| biological_process | response to biotic stimulus       | 10        | 67        | 475       | 7524      | 0.022             | 0.00879             |
| biological_process | response to stimulus              | 14        | 67        | 828       | 7524      | 0.0258            | 0.0129              |
| cellular_component | myosin                            | 3         | 67        | 31        | 7778      | 0.0282            | 0.00231             |
| molecular_function | binding                           | 47        | 67        | 4797      | 8294      | 0.0318            | 0.0256              |
| molecular_function | calcium ion binding               | 8         | 67        | 389       | 8294      | 0.0341            | 0.0126              |
| biological_process | response to external stimulus     | 12        | 67        | 699       | 7524      | 0.0393            | 0.0192              |
| biological_process | development                       | 16        | 67        | 1099      | 7524      | 0.0504            | 0.0291              |

|                    |                                    |    |    |     |      |        |        |
|--------------------|------------------------------------|----|----|-----|------|--------|--------|
| molecular_function | sugar binding                      | 4  | 67 | 117 | 8294 | 0.066  | 0.0146 |
| molecular_function | carbohydrate binding               | 4  | 67 | 120 | 8294 | 0.0701 | 0.0159 |
| biological_process | humoral immune response            | 3  | 67 | 51  | 7524 | 0.0734 | 0.0104 |
| biological_process | immune response                    | 7  | 67 | 345 | 7524 | 0.0809 | 0.0329 |
| biological_process | response to pest/pathogen/parasite | 5  | 67 | 187 | 7524 | 0.0812 | 0.0251 |
| biological_process | response to chemical substance     | 4  | 67 | 116 | 7524 | 0.0813 | 0.0195 |
| biological_process | response to stress                 | 7  | 67 | 383 | 7524 | 0.118  | 0.0529 |
| biological_process | protein folding                    | 3  | 67 | 70  | 7524 | 0.125  | 0.0242 |
| cellular_component | cytoskeleton                       | 7  | 67 | 405 | 7778 | 0.128  | 0.0585 |
| cellular_component | lytic vacuole                      | 3  | 67 | 74  | 7778 | 0.13   | 0.0256 |
| cellular_component | lysosome                           | 3  | 67 | 74  | 7778 | 0.13   | 0.0256 |
| molecular_function | metal ion binding                  | 10 | 67 | 741 | 8294 | 0.131  | 0.0725 |
| biological_process | chemotaxis                         | 3  | 67 | 74  | 7524 | 0.137  | 0.0279 |
| biological_process | taxis                              | 3  | 67 | 74  | 7524 | 0.137  | 0.0279 |
| biological_process | morphogenesis                      | 10 | 67 | 680 | 7524 | 0.138  | 0.077  |
| cellular_component | vacuole                            | 3  | 67 | 81  | 7778 | 0.15   | 0.0324 |
| molecular_function | transmembrane receptor activity    | 8  | 67 | 559 | 8294 | 0.155  | 0.0798 |
| biological_process | heterophilic cell adhesion         | 3  | 67 | 83  | 7524 | 0.165  | 0.0374 |
| biological_process | organogenesis                      | 9  | 67 | 616 | 7524 | 0.169  | 0.0943 |
| biological_process | inflammatory response              | 3  | 67 | 92  | 7524 | 0.193  | 0.0484 |
| biological_process | innate immune response             | 3  | 67 | 95  | 7524 | 0.203  | 0.0523 |

**Cluster B**

| <b>System</b>      | <b>Category</b>                                                                   | <b>LH</b> | <b>LT</b> | <b>PH</b> | <b>PT</b> | <b>EASE Score</b> | <b>Fisher Exact</b> |
|--------------------|-----------------------------------------------------------------------------------|-----------|-----------|-----------|-----------|-------------------|---------------------|
| cellular_component | extracellular                                                                     | 44        | 69        | 2250      | 7778      | 3.89E-09          | 1.74E-09            |
| cellular_component | extracellular space                                                               | 39        | 69        | 2116      | 7778      | 0.000000528       | 0.000000249         |
| cellular_component | extracellular matrix                                                              | 10        | 69        | 226       | 7778      | 0.00014           | 0.0000266           |
| biological_process | muscle development                                                                | 6         | 67        | 72        | 7524      | 0.000396          | 0.0000391           |
| molecular_function | copper ion binding                                                                | 4         | 68        | 30        | 8294      | 0.00175           | 0.0000965           |
| molecular_function | metal ion binding                                                                 | 15        | 68        | 741       | 8294      | 0.00203           | 0.000791            |
| molecular_function | oxidoreductase activity, acting on the CH-NH2 group of donors, oxygen as acceptor | 3         | 68        | 12        | 8294      | 0.00403           | 0.00011             |
| molecular_function | heparin binding                                                                   | 4         | 68        | 42        | 8294      | 0.00462           | 0.000366            |
| molecular_function | oxidoreductase activity, acting on the CH-NH2 group of donors                     | 3         | 68        | 14        | 8294      | 0.00549           | 0.00018             |
| molecular_function | extracellular matrix structural constituent                                       | 4         | 68        | 53        | 8294      | 0.00885           | 0.000895            |
| molecular_function | glycosaminoglycan binding                                                         | 4         | 68        | 55        | 8294      | 0.0098            | 0.00103             |
| cellular_component | actin cytoskeleton                                                                | 5         | 69        | 123       | 7778      | 0.0223            | 0.00457             |
| molecular_function | extracellular matrix structural constituent conferring tensile strength           | 3         | 68        | 29        | 8294      | 0.0227            | 0.00165             |
| biological_process | cell adhesion                                                                     | 9         | 67        | 404       | 7524      | 0.0242            | 0.00911             |
| biological_process | complement activation                                                             | 3         | 67        | 29        | 7524      | 0.0264            | 0.00209             |
| cellular_component | myosin                                                                            | 3         | 69        | 31        | 7778      | 0.0298            | 0.00251             |
| cellular_component | collagen                                                                          | 3         | 69        | 31        | 7778      | 0.0298            | 0.00251             |
| biological_process | immune response                                                                   | 8         | 67        | 345       | 7524      | 0.0307            | 0.0111              |
| biological_process | catabolism                                                                        | 11        | 67        | 595       | 7524      | 0.0333            | 0.0151              |
| molecular_function | calcium ion binding                                                               | 8         | 68        | 389       | 8294      | 0.0366            | 0.0137              |
| molecular_function | oxidoreductase activity                                                           | 9         | 68        | 475       | 8294      | 0.0366            | 0.0149              |
| biological_process | humoral defense mechanism (sensu Vertebrata)                                      | 3         | 67        | 37        | 7524      | 0.0415            | 0.00422             |
| biological_process | organismal physiological process                                                  | 12        | 67        | 707       | 7524      | 0.0422            | 0.0208              |
| cellular_component | sarcomere                                                                         | 3         | 69        | 38        | 7778      | 0.0433            | 0.00451             |
| cellular_component | myofibril                                                                         | 3         | 69        | 39        | 7778      | 0.0453            | 0.00486             |

|                    |                                                                         |   |    |     |      |        |         |
|--------------------|-------------------------------------------------------------------------|---|----|-----|------|--------|---------|
| cellular_component | muscle fiber                                                            | 3 | 69 | 40  | 7778 | 0.0475 | 0.00522 |
| biological_process | integrin-mediated signaling pathway                                     | 3 | 67 | 42  | 7524 | 0.0521 | 0.00605 |
| molecular_function | transition metal ion binding                                            | 6 | 68 | 264 | 8294 | 0.0616 | 0.0207  |
| molecular_function | metallopeptidase activity                                               | 4 | 68 | 113 | 8294 | 0.063  | 0.0136  |
| molecular_function | hematopoietin/interferon-class (D200-domain) cytokine receptor activity | 3 | 68 | 51  | 8294 | 0.0636 | 0.00829 |
| biological_process | cell growth                                                             | 3 | 67 | 48  | 7524 | 0.0661 | 0.00877 |
| molecular_function | peptidase activity                                                      | 8 | 68 | 447 | 8294 | 0.0679 | 0.029   |
| biological_process | humoral immune response                                                 | 3 | 67 | 51  | 7524 | 0.0734 | 0.0104  |
| biological_process | response to pest/pathogen/parasite                                      | 5 | 67 | 187 | 7524 | 0.0812 | 0.0251  |
| biological_process | response to chemical substance                                          | 4 | 67 | 116 | 7524 | 0.0813 | 0.0195  |
| biological_process | defense response                                                        | 8 | 67 | 434 | 7524 | 0.0845 | 0.0379  |
| molecular_function | hydrolase activity, acting on glycosyl bonds                            | 3 | 68 | 64  | 8294 | 0.0942 | 0.0154  |
| molecular_function | metalloendopeptidase activity                                           | 3 | 68 | 74  | 8294 | 0.12   | 0.0226  |
| biological_process | response to biotic stimulus                                             | 8 | 67 | 475 | 7524 | 0.121  | 0.0589  |
| cellular_component | lytic vacuole                                                           | 3 | 69 | 74  | 7778 | 0.136  | 0.0277  |
| cellular_component | lysosome                                                                | 3 | 69 | 74  | 7778 | 0.136  | 0.0277  |
| biological_process | taxis                                                                   | 3 | 67 | 74  | 7524 | 0.137  | 0.0279  |
| biological_process | chemotaxis                                                              | 3 | 67 | 74  | 7524 | 0.137  | 0.0279  |
| molecular_function | endopeptidase activity                                                  | 5 | 68 | 246 | 8294 | 0.137  | 0.0507  |
| molecular_function | structural molecule activity                                            | 7 | 68 | 435 | 8294 | 0.138  | 0.0644  |
| cellular_component | cytoskeleton                                                            | 7 | 69 | 405 | 7778 | 0.142  | 0.0665  |
| biological_process | embryonic development                                                   | 3 | 67 | 76  | 7524 | 0.143  | 0.0299  |
| cellular_component | vacuole                                                                 | 3 | 69 | 81  | 7778 | 0.158  | 0.0349  |

**Cluster C**

| <b>System</b>      | <b>Category</b>                                                         | <b>LH</b> | <b>LT</b> | <b>PH</b> | <b>PT</b> | <b>EASE Score</b> | <b>Fisher Exact</b> |
|--------------------|-------------------------------------------------------------------------|-----------|-----------|-----------|-----------|-------------------|---------------------|
| cellular_component | extracellular                                                           | 79        | 112       | 2250      | 7778      | 1.14E-19          | 4.58E-20            |
| cellular_component | extracellular matrix                                                    | 26        | 112       | 226       | 7778      | 4.83E-16          | 5.45E-17            |
| cellular_component | extracellular space                                                     | 70        | 112       | 2116      | 7778      | 9.14E-15          | 4.05E-15            |
| molecular_function | extracellular matrix structural constituent                             | 14        | 102       | 53        | 8294      | 3.3E-14           | 1.14E-15            |
| cellular_component | collagen                                                                | 12        | 112       | 31        | 7778      | 2.01E-13          | 4.8E-15             |
| biological_process | cell adhesion                                                           | 29        | 104       | 404       | 7524      | 3.46E-13          | 6.24E-14            |
| molecular_function | extracellular matrix structural constituent conferring tensile strength | 11        | 102       | 29        | 8294      | 7.53E-13          | 1.59E-14            |
| molecular_function | structural molecule activity                                            | 19        | 102       | 435       | 8294      | 0.00000417        | 0.00000112          |
| cellular_component | basement membrane                                                       | 6         | 112       | 36        | 7778      | 0.000143          | 0.0000107           |
| molecular_function | calcium ion binding                                                     | 15        | 102       | 389       | 8294      | 0.000243          | 0.0000739           |
| molecular_function | peptidyl-prolyl cis-trans isomerase activity                            | 5         | 102       | 26        | 8294      | 0.000252          | 0.0000137           |
| molecular_function | cis-trans isomerase activity                                            | 5         | 102       | 27        | 8294      | 0.000293          | 0.0000166           |
| cellular_component | fibrillar collagen                                                      | 3         | 112       | 3         | 7778      | 0.0006            | 0.00000291          |
| cellular_component | collagen type V                                                         | 3         | 112       | 3         | 7778      | 0.0006            | 0.00000291          |
| molecular_function | isomerase activity                                                      | 7         | 102       | 90        | 8294      | 0.000766          | 0.000112            |
| cellular_component | endoplasmic reticulum                                                   | 13        | 112       | 310       | 7778      | 0.00149           | 0.000483            |
| molecular_function | serine-type endopeptidase inhibitor activity                            | 6         | 102       | 72        | 8294      | 0.00178           | 0.000242            |
| molecular_function | metal ion binding                                                       | 19        | 102       | 741       | 8294      | 0.00333           | 0.00153             |
| molecular_function | enzyme inhibitor activity                                               | 7         | 102       | 139       | 8294      | 0.00686           | 0.00157             |
| molecular_function | endopeptidase inhibitor activity                                        | 6         | 102       | 103       | 8294      | 0.00828           | 0.00163             |
| molecular_function | protease inhibitor activity                                             | 6         | 102       | 104       | 8294      | 0.00862           | 0.00171             |
| biological_process | cell communication                                                      | 36        | 104       | 1767      | 7524      | 0.00978           | 0.0064              |
| biological_process | protein folding                                                         | 5         | 104       | 70        | 7524      | 0.0152            | 0.00272             |
| biological_process | cell growth                                                             | 4         | 104       | 48        | 7524      | 0.0276            | 0.0042              |
| biological_process | response to biotic stimulus                                             | 13        | 104       | 475       | 7524      | 0.0283            | 0.0134              |

|                    |                                                            |    |     |      |      |        |         |
|--------------------|------------------------------------------------------------|----|-----|------|------|--------|---------|
| molecular_function | glycosaminoglycan binding                                  | 4  | 102 | 55   | 8294 | 0.0291 | 0.00455 |
| biological_process | regulation of biological process                           | 8  | 104 | 223  | 7524 | 0.0329 | 0.0118  |
| biological_process | defense response                                           | 12 | 104 | 434  | 7524 | 0.0345 | 0.0162  |
| biological_process | cellular process                                           | 65 | 104 | 3973 | 7524 | 0.0345 | 0.0284  |
| biological_process | regulation of cellular process                             | 7  | 104 | 180  | 7524 | 0.0366 | 0.0121  |
| biological_process | immune response                                            | 10 | 104 | 345  | 7524 | 0.0461 | 0.0205  |
| molecular_function | heparin binding                                            | 3  | 102 | 42   | 8294 | 0.0924 | 0.0147  |
| biological_process | response to external stimulus                              | 15 | 104 | 699  | 7524 | 0.0941 | 0.0564  |
| biological_process | regulation of cell growth                                  | 3  | 104 | 39   | 7524 | 0.0992 | 0.0164  |
| biological_process | blood coagulation                                          | 3  | 104 | 40   | 7524 | 0.104  | 0.0175  |
| biological_process | coagulation                                                | 3  | 104 | 40   | 7524 | 0.104  | 0.0175  |
| biological_process | heterophilic cell adhesion                                 | 4  | 104 | 83   | 7524 | 0.105  | 0.0275  |
| biological_process | hemostasis                                                 | 3  | 104 | 42   | 7524 | 0.112  | 0.0199  |
| biological_process | response to pest/pathogen/parasite                         | 6  | 104 | 187  | 7524 | 0.113  | 0.0445  |
| molecular_function | lipid binding                                              | 4  | 102 | 98   | 8294 | 0.117  | 0.0323  |
| molecular_function | nucleotide receptor activity, G-protein coupled            | 3  | 102 | 49   | 8294 | 0.12   | 0.0221  |
| molecular_function | nucleotide receptor activity                               | 3  | 102 | 49   | 8294 | 0.12   | 0.0221  |
| molecular_function | purinergic nucleotide receptor activity                    | 3  | 102 | 49   | 8294 | 0.12   | 0.0221  |
| molecular_function | purinergic nucleotide receptor activity, G-protein coupled | 3  | 102 | 49   | 8294 | 0.12   | 0.0221  |
| biological_process | regulation of body fluids                                  | 3  | 104 | 44   | 7524 | 0.121  | 0.0226  |

**Cluster D**

| <b>System</b>      | <b>Category</b>                                      | <b>LH</b> | <b>LT</b> | <b>PH</b> | <b>PT</b> | <b>EASE Score</b> | <b>Fisher Exact</b> |
|--------------------|------------------------------------------------------|-----------|-----------|-----------|-----------|-------------------|---------------------|
| cellular_component | intermediate filament cytoskeleton                   | 4         | 41        | 57        | 7778      | 0.00304           | 0.000215            |
| cellular_component | intermediate filament                                | 4         | 41        | 57        | 7778      | 0.00304           | 0.000215            |
| cellular_component | intercellular junction                               | 4         | 41        | 72        | 7778      | 0.00588           | 0.000528            |
| molecular_function | structural molecule activity                         | 8         | 45        | 435       | 8294      | 0.00739           | 0.00208             |
| cellular_component | apicolateral plasma membrane                         | 4         | 41        | 86        | 7778      | 0.0096            | 0.00103             |
| cellular_component | cell junction                                        | 4         | 41        | 92        | 7778      | 0.0115            | 0.00133             |
| cellular_component | cytoskeleton                                         | 7         | 41        | 405       | 7778      | 0.0164            | 0.00476             |
| biological_process | cell communication                                   | 16        | 39        | 1767      | 7524      | 0.0201            | 0.0111              |
| biological_process | neuropeptide signaling pathway                       | 3         | 39        | 56        | 7524      | 0.0322            | 0.00295             |
| biological_process | cellular process                                     | 27        | 39        | 3973      | 7524      | 0.0371            | 0.0275              |
| biological_process | organelle organization and biogenesis                | 5         | 39        | 267       | 7524      | 0.0445            | 0.0116              |
| molecular_function | receptor signaling protein activity                  | 3         | 45        | 77        | 8294      | 0.0627            | 0.00825             |
| biological_process | G-protein coupled receptor protein signaling pathway | 6         | 39        | 430       | 7524      | 0.0633            | 0.0221              |
| molecular_function | structural constituent of cytoskeleton               | 3         | 45        | 79        | 8294      | 0.0655            | 0.00886             |
| biological_process | cytoplasm organization and biogenesis                | 5         | 39        | 333       | 7524      | 0.0855            | 0.0276              |
| biological_process | intracellular signaling cascade                      | 6         | 39        | 491       | 7524      | 0.0987            | 0.039               |
| biological_process | cytoskeleton organization and biogenesis             | 4         | 39        | 224       | 7524      | 0.103             | 0.0279              |
| biological_process | signal transduction                                  | 11        | 39        | 1327      | 7524      | 0.119             | 0.0693              |
| biological_process | cell surface receptor linked signal transduction     | 7         | 39        | 739       | 7524      | 0.164             | 0.0825              |
| biological_process | cell-cell signaling                                  | 3         | 39        | 145       | 7524      | 0.166             | 0.0387              |

**Cluster E**

| <b>System</b>      | <b>Category</b>                            | <b>LH</b> | <b>LT</b> | <b>PH</b> | <b>PT</b> | <b>EASE Score</b> | <b>Fisher Exact</b> |
|--------------------|--------------------------------------------|-----------|-----------|-----------|-----------|-------------------|---------------------|
| biological_process | organogenesis                              | 12        | 51        | 616       | 7524      | 0.00197           | 0.000661            |
| biological_process | development                                | 16        | 51        | 1099      | 7524      | 0.00398           | 0.00179             |
| biological_process | morphogenesis                              | 12        | 51        | 680       | 7524      | 0.00428           | 0.00158             |
| molecular_function | transcription factor activity              | 11        | 56        | 641       | 8294      | 0.00863           | 0.00324             |
| molecular_function | transcription regulator activity           | 12        | 56        | 779       | 8294      | 0.012             | 0.00502             |
| cellular_component | membrane                                   | 29        | 50        | 3161      | 7778      | 0.0141            | 0.00963             |
| biological_process | transcription                              | 14        | 51        | 1147      | 7524      | 0.0333            | 0.0176              |
| molecular_function | calcium ion binding                        | 7         | 56        | 389       | 8294      | 0.0428            | 0.0151              |
| biological_process | regulation of transcription, DNA-dependent | 13        | 51        | 1085      | 7524      | 0.0483            | 0.0258              |
| cellular_component | transcription factor complex               | 6         | 50        | 319       | 7778      | 0.0492            | 0.0158              |
| biological_process | regulation of transcription                | 13        | 51        | 1103      | 7524      | 0.0537            | 0.0292              |
| biological_process | transcription, DNA-dependent               | 13        | 51        | 1105      | 7524      | 0.0544            | 0.0296              |
| biological_process | skeletal development                       | 3         | 51        | 63        | 7524      | 0.0654            | 0.00876             |
| cellular_component | intercellular junction                     | 3         | 50        | 72        | 7778      | 0.0752            | 0.0109              |
| cellular_component | nucleoplasm                                | 6         | 50        | 375       | 7778      | 0.0856            | 0.032               |
| cellular_component | integral to membrane                       | 22        | 50        | 2566      | 7778      | 0.0949            | 0.0677              |
| cellular_component | cell                                       | 45        | 50        | 6360      | 7778      | 0.0956            | 0.0857              |
| cellular_component | apicolateral plasma membrane               | 3         | 50        | 86        | 7778      | 0.102             | 0.0176              |
| molecular_function | DNA binding                                | 13        | 56        | 1225      | 8294      | 0.103             | 0.061               |
| cellular_component | cell junction                              | 3         | 50        | 92        | 7778      | 0.114             | 0.021               |
| molecular_function | metal ion binding                          | 9         | 56        | 741       | 8294      | 0.114             | 0.0586              |
| biological_process | neurogenesis                               | 4         | 51        | 199       | 7524      | 0.145             | 0.0452              |
| biological_process | lipid biosynthesis                         | 3         | 51        | 110       | 7524      | 0.166             | 0.0381              |



**Cluster F**

| <b>System</b>      | <b>Category</b>                    | <b>LH</b> | <b>LT</b> | <b>PH</b> | <b>PT</b> | <b>EASE Score</b> | <b>Fisher Exact</b> |
|--------------------|------------------------------------|-----------|-----------|-----------|-----------|-------------------|---------------------|
| biological_process | immune response                    | 17        | 48        | 345       | 7524      | 1.11E-10          | 1.37E-11            |
| biological_process | defense response                   | 18        | 48        | 434       | 7524      | 3.5E-10           | 5.18E-11            |
| biological_process | response to biotic stimulus        | 18        | 48        | 475       | 7524      | 1.42E-09          | 2.3E-10             |
| biological_process | response to external stimulus      | 19        | 48        | 699       | 7524      | 7.38E-08          | 1.68E-08            |
| biological_process | organismal physiological process   | 18        | 48        | 707       | 7524      | 0.000000528       | 0.000000129         |
| biological_process | response to stimulus               | 19        | 48        | 828       | 7524      | 0.000000961       | 0.00000026          |
| biological_process | response to wounding               | 5         | 48        | 125       | 7524      | 0.00746           | 0.00113             |
| biological_process | regulation of biological process   | 6         | 48        | 223       | 7524      | 0.0122            | 0.00275             |
| biological_process | regulation of cell proliferation   | 4         | 48        | 81        | 7524      | 0.0139            | 0.00169             |
| molecular_function | cytokine activity                  | 5         | 50        | 170       | 8294      | 0.0176            | 0.00343             |
| biological_process | inflammatory response              | 4         | 48        | 92        | 7524      | 0.0195            | 0.0027              |
| biological_process | innate immune response             | 4         | 48        | 95        | 7524      | 0.0212            | 0.00303             |
| biological_process | regulation of cellular process     | 5         | 48        | 180       | 7524      | 0.0254            | 0.00552             |
| biological_process | response to pest/pathogen/parasite | 5         | 48        | 187       | 7524      | 0.0287            | 0.00648             |
| biological_process | cell proliferation                 | 8         | 48        | 556       | 7524      | 0.0554            | 0.023               |
| biological_process | taxis                              | 3         | 48        | 74        | 7524      | 0.0777            | 0.0115              |
| biological_process | chemotaxis                         | 3         | 48        | 74        | 7524      | 0.0777            | 0.0115              |
| cellular_component | nucleus                            | 16        | 44        | 1941      | 7778      | 0.0943            | 0.0611              |
| molecular_function | electron transporter activity      | 3         | 50        | 89        | 8294      | 0.0969            | 0.0163              |
| biological_process | cell differentiation               | 4         | 48        | 189       | 7524      | 0.114             | 0.0318              |
| biological_process | response to chemical substance     | 3         | 48        | 116       | 7524      | 0.163             | 0.0374              |
| biological_process | regulation of cell cycle           | 4         | 48        | 228       | 7524      | 0.17              | 0.0566              |

## Cluster G

| System             | Category                | LH | LT | PH  | PT   | EASE Score | Fisher Exact |
|--------------------|-------------------------|----|----|-----|------|------------|--------------|
| molecular_function | oxidoreductase activity | 3  | 7  | 475 | 8294 | 0.0421     | 0.00549      |

**Cluster H**

| <b>System</b>      | <b>Category</b>                 | <b>LH</b> | <b>LT</b> | <b>PH</b> | <b>PT</b> | <b>EASE Score</b> | <b>Fisher Exact</b> |
|--------------------|---------------------------------|-----------|-----------|-----------|-----------|-------------------|---------------------|
| biological_process | transport                       | 6         | 14        | 1253      | 7524      | 0.0508            | 0.0189              |
| biological_process | cell growth and/or maintenance  | 8         | 14        | 2290      | 7524      | 0.0668            | 0.0341              |
| biological_process | physiological process           | 14        | 14        | 6119      | 7524      | 0.0679            | 0.0552              |
| biological_process | intracellular protein transport | 3         | 14        | 293       | 7524      | 0.0889            | 0.0155              |
| biological_process | protein metabolism              | 6         | 14        | 1471      | 7524      | 0.0914            | 0.0395              |
| biological_process | protein modification            | 4         | 14        | 652       | 7524      | 0.0963            | 0.0277              |
| biological_process | protein transport               | 3         | 14        | 311       | 7524      | 0.0984            | 0.0181              |
| biological_process | cellular physiological process  | 8         | 14        | 2613      | 7524      | 0.125             | 0.072               |
| molecular_function | transferase activity            | 5         | 18        | 965       | 8294      | 0.127             | 0.0497              |
| biological_process | intracellular transport         | 3         | 14        | 369       | 7524      | 0.131             | 0.0285              |
| molecular_function | catalytic activity              | 10        | 18        | 3123      | 8294      | 0.147             | 0.0941              |
| molecular_function | receptor binding                | 3         | 18        | 367       | 8294      | 0.172             | 0.0428              |
| biological_process | phosphorus metabolism           | 3         | 14        | 479       | 7524      | 0.199             | 0.0552              |
| biological_process | phosphate metabolism            | 3         | 14        | 479       | 7524      | 0.199             | 0.0552              |

## **Legend**

LH - Number of genes in data set (cluster) belonging to this category

LT - Total number of genes in data set (cluster) with ontology annotation

PH - Number of genes belonging to this category in the entire annotated genome

PT - Total number of genes in the mouse genome with annotation.

EASE Score/Fisher Exact - the statistical probability that the overrepresentation of a specific GO term will arise
